# Supplementary material
Source: bioRxiv or medRxiv preprint supplement (https://www.biorxiv.org/highwire/filestream/125675/field_highwire_adjunct_files/0/416800-1.pdf)
Supplement: Supplementary file [file 416800-1.pdf]

# Colon project statistical analyses

## Analyses performed in this document:

1. Which signatures are ubiquitous and which are sporadic?
2. How does the mutation burden vary with age and with site in the colon for ubiquitous signatures?
3. When do copy number changes occur?
4. Driver discovery by dNdScv.
5. Test whether the global frequency of driver mutations is different between cancer and normal.

### Load packages

```
suppressMessages(library("GenomicRanges"))
suppressMessages(library("nrmisc"))
suppressMessages(library("Biostrings"))
suppressMessages(library("lme4"))
suppressMessages(library("RColorBrewer"))
suppressMessages(library("seqinr"))
suppressMessages(library("MASS"))
suppressMessages(library("dndscv"))
```

```
## Warning: replacing previous import 'Biostrings::translate' by
## 'seqinr::translate' when loading 'dndscv'
```

```
suppressMessages(library("MutationTimeR"))
```

## 1) Which signatures are common and which are rare?

Read in input file of number of mutations due to each signature in each sample.

```
cc <- read.csv("model_input.txt", sep="\t", header=T, stringsAsFactors = T)
cc$sitecol <- as.character(cc$sitecol)
sigs <- colnames(cc)[13:38]

mycols <- c("grey", brewer.pal(n=9, name="Set1")[-6], brewer.pal(n=12, name="Set3")
)[-c(2,12)], brewer.pal(n=8, name="Dark2"))
mycols <- mycols[!grepl("X0", sigs)]
sigs <- sigs[!grepl("X0", sigs)] # remove the residual.
mycols <- mycols[1:length(sigs)]

sbssigs <- grep("sbs",sigs, value=T)
dbssigs <- grep("dbs",sigs, value=T)
idsigs <- grep("id",sigs, value=T)
large <- sigs[!sigs %in% c(sbssigs, dbssigs, idsigs)]
str(cc)
```

```

## 'data.frame':      445 obs. of  43 variables:
## $ crypt      : Factor w/ 445 levels "HLS_1C_30_B5",...: 1 2 3 4 5 6 7 8 9 10 ...
## $ site       : Factor w/ 4 levels "Ileum","Left",...: 3 3 3 3 3 3 3 3 4 4 ...
## $ sex        : Factor w/ 3 levels "female","Female",...: 1 1 1 1 1 1 3 3 3 3 ...
## $ age        : int  60 60 60 60 60 60 79 79 79 79 ...
## $ med_vafs   : num  0.44 0.41 0.43 0.45 0.46 0.45 0.4 0.44 0.38 0.44 ...
## $ med_depths: num  12 10 12 9 8 9 17 18 17 16 ...
## $ vafdep     : num  5.28 4.1 5.16 4.05 3.68 4.05 6.8 7.92 6.46 7.04 ...
## $ expt       : Factor w/ 18 levels "cancerNL","extrapaeds",...: 3 3 3 3 3 3 3 3 3 3 3 3 3 3 3 3 3 3 ...
## $ library    : Factor w/ 2 levels "fragmentation",...: 2 2 2 2 2 2 2 2 2 2 ...
## $ sitecol    : chr  "firebrick3" "firebrick3" "firebrick3" "firebrick3" ...
## $ cancer.pt  : Factor w/ 2 levels "No","Yes": 1 1 1 1 1 1 1 1 1 1 ...
## $ patient    : Factor w/ 42 levels "300","312","HLS",...: 3 3 3 3 3 3 35 35 35 3 5 ...
## $ sbs.X0     : num  140.2 77.5 53.3 30.8 84 ...
## $ sbs.SBS1   : num  1240 1124 1037 1225 1273 ...
## $ sbs.SBS5   : num  1666 1552 1319 1687 1910 ...
## $ sbs.SBS18  : num  651 818 561 675 682 ...
## $ sbs.SBS2   : num  0.00739 0.03818 0.012 0.00417 0.03133 ...
## $ sbs.SBS13  : num  0.01331 0.00182 0.012 0.00209 1.18824 ...
## $ sbs.N1     : num  0.0458 0.22 0.093 0.0751 0.0157 ...
## $ sbs.N2     : num  227 455 485 403 616 ...
## $ sbs.N3     : num  0.25 0.867 0.243 2.997 0.779 ...
## $ sbs.N4     : num  0.3298 0.0582 1.4065 0.486 0.2685 ...
## $ dbs.X0     : num  0.0037 0.01091 0.00675 0.00313 0.01678 ...
## $ dbs.DBS2   : num  0.26 1.921 1.587 0.736 0.782 ...
## $ dbs.DBS4   : num  0.277 2.042 1.688 0.783 0.832 ...
## $ dbs.DBS6   : num  0.148 1.095 0.905 0.42 0.446 ...
## $ dbs.DBS8   : num  0.00148 0.02545 0.00825 0.00313 0.0235 ...
## $ dbs.DBS9   : num  0.207 1.53 1.264 0.586 0.623 ...
## $ dbs.DBS11  : num  0.17 1.25 1.03 0.48 0.51 ...
## $ id.X0      : num  0 0 0 0 0 ...
## $ id.ID1     : num  0 0 0 0 0 ...
## $ id.ID2     : num  0 0 0 0 0 ...
## $ id.ID5     : num  0 0 0 0 0 ...
## $ id.N2      : num  0 0 0 0 0 ...
## $ id.N3      : num  0 0 0 0 0 ...
## $ svb        : int  1 0 0 0 2 0 0 0 0 1 ...
## $ chromamps  : int  0 0 0 0 0 0 0 0 0 0 ...
## $ loh        : int  0 0 0 0 0 0 0 0 0 0 ...
## $ total      : num  3927 4036 3464 4028 4572 ...
## $ sbstotal   : num  3784 3950 3404 3994 4483 ...
## $ dbstotal   : num  1.06 7.86 6.49 3.01 3.22 ...
## $ idtotal    : num  0 0 0 0 0 ...
## $ largetotal: int  1 0 0 0 2 0 0 0 0 1 ...

```

Define the presence or absence of a signature to count which samples it is in.

```

propn_with_sig <- c()
for (sig in sigs) {
  if (sig %in% large) {
    tc <- cc[,c(sig, "largetotal")]
  }
  if (sig %in% sbssigs) {
    tc <- cc[,c(sig, "sbstotal")]
  }
  if (sig %in% dbssigs) {
    tc <- cc[,c(sig, "dbstotal")]
  }
  if (sig %in% idsigs) {
    tc <- cc[,c(sig, "idtotal")]
  }
  tc <- tc[complete.cases(tc),]
  tc$prop <- tc[,1]/tc[,2]

  proppres <- nrow(tc[(tc[,1]>100 | tc$prop>0.05) & tc[,1]>0,])/nrow(tc)
  propn_with_sig <- c(propn_with_sig, proppres)
}
ps <- data.frame(cbind(sigs, propn_with_sig),stringsAsFactors = F)

ps

```

```

##          sigs          propn_with_sig
## 1  sbs.SBS1              1
## 2  sbs.SBS5              1
## 3  sbs.SBS18  0.997752808988764
## 4  sbs.SBS2  0.00449438202247191
## 5  sbs.SBS13  0.00449438202247191
## 6   sbs.N1   0.0269662921348315
## 7   sbs.N2   0.30561797752809
## 8   sbs.N3   0.051685393258427
## 9   sbs.N4   0.0269662921348315
## 10  dbs.DBS2  0.898876404494382
## 11  dbs.DBS4  0.898876404494382
## 12  dbs.DBS6  0.887640449438202
## 13  dbs.DBS8  0.112359550561798
## 14  dbs.DBS9  0.89438202247191
## 15  dbs.DBS11 0.889887640449438
## 16   id.ID1  0.937078651685393
## 17   id.ID2  0.889887640449438
## 18   id.ID5  0.964044943820225
## 19   id.N2  0.467415730337079
## 20   id.N3  0.0651685393258427
## 21     svb   0.148314606741573
## 22 chromamps 0.00674157303370787
## 23     loh   0.0224719101123595

```

Define those in which >85% of the crypts have the sig by these criteria as common, and the rest as rare.

```

hist(as.numeric(ps$propn_with_sig), col="grey", xlim=c(0,1), 40, main="Proportion
of samples with each signature",
      xlab="Proportion of samples", ylab="Number of signatures", cex.main=0.8)
abline(v=0.85, col="red", lwd=2)

```

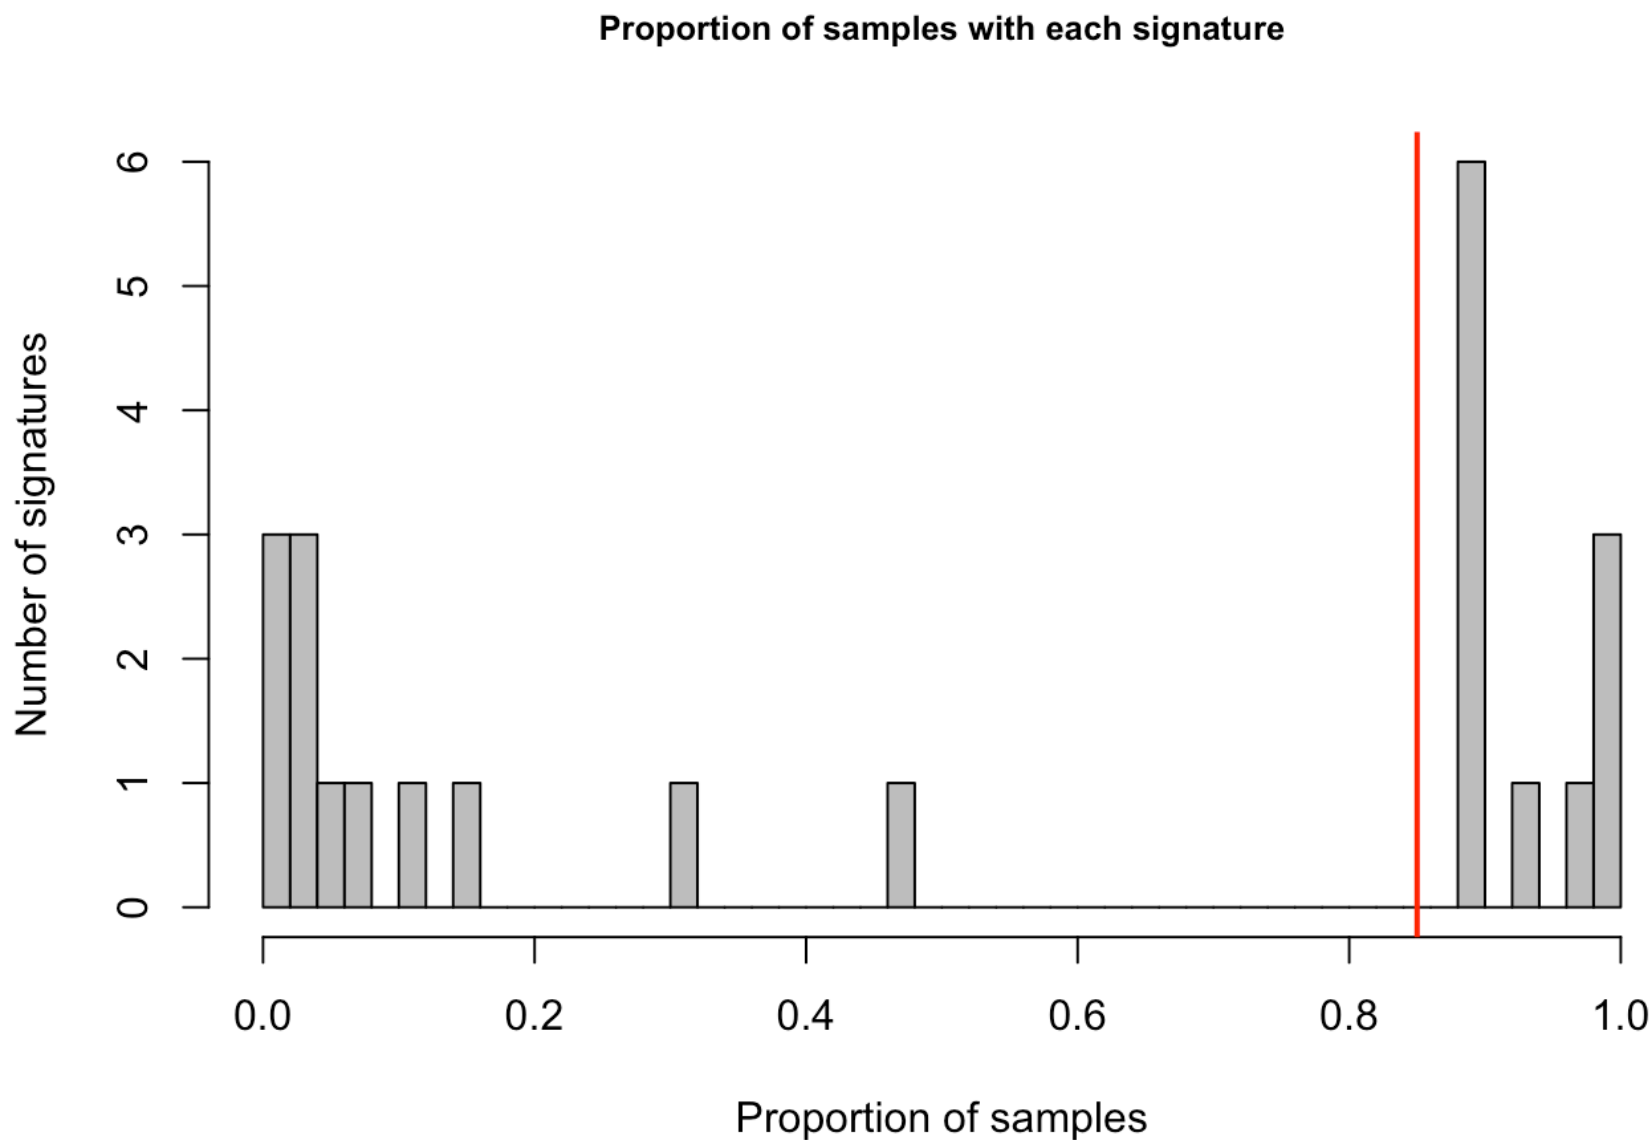

```
ps[ps$propn_with_sig>0.85,]
```

```

##          sigs      propn_with_sig
## 1  sbs.SBS1          1
## 2  sbs.SBS5          1
## 3  sbs.SBS18 0.997752808988764
## 10 dbs.DBS2 0.898876404494382
## 11 dbs.DBS4 0.898876404494382
## 12 dbs.DBS6 0.887640449438202
## 14 dbs.DBS9 0.89438202247191
## 15 dbs.DBS11 0.889887640449438
## 16   id.ID1 0.937078651685393
## 17   id.ID2 0.889887640449438
## 18   id.ID5 0.964044943820225

```

```
ubiquitous <- ps[ps$propn_with_sig>0.85,"sigs"]
```

## 2) Mutation burden vs age and site for ubiquitous signatures with large mutation numbers: SBS1, SBS5, SBS18, ID1, ID2, ID5

Plot the burden of each signature in every crypt versus age, colouring by site.

```
par(mfrow=c(2,2))
par(mar=c(3,3,3,1))
i <- 1
for (sig in c("total", sigs)) {
  plot(cc[,sig] ~ cc[,"age"], col=cc$sitecol, pch=16, xlim=c(0,80), ylim=c(0, max(
cc[,sig])),
      ylab="Mutations", xlab="Patient age", main=sig, frame.plot=F)
  if (i==1) {
    legend("topleft", legend=c(unique(as.character(cc$site))), pch=16, col=unique(
cc$sitecol), bty="n", cex=1.2)
  }
  i <- i + 1
}
```

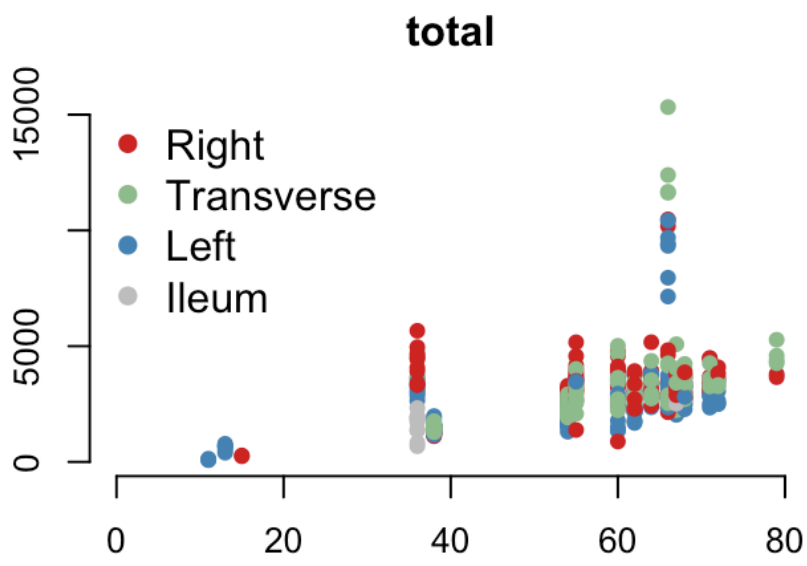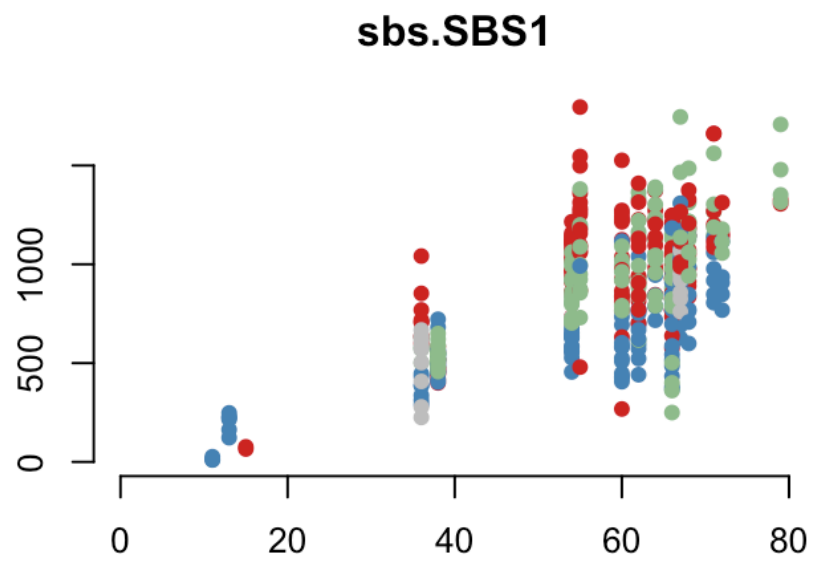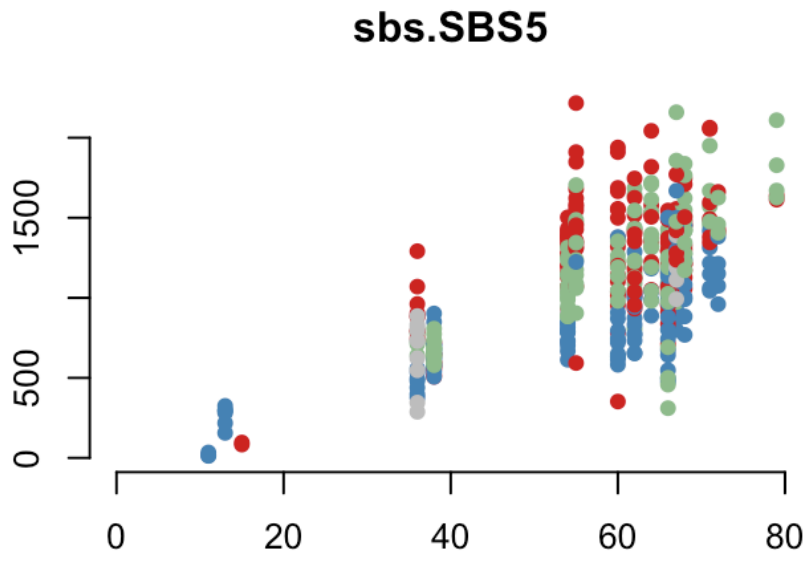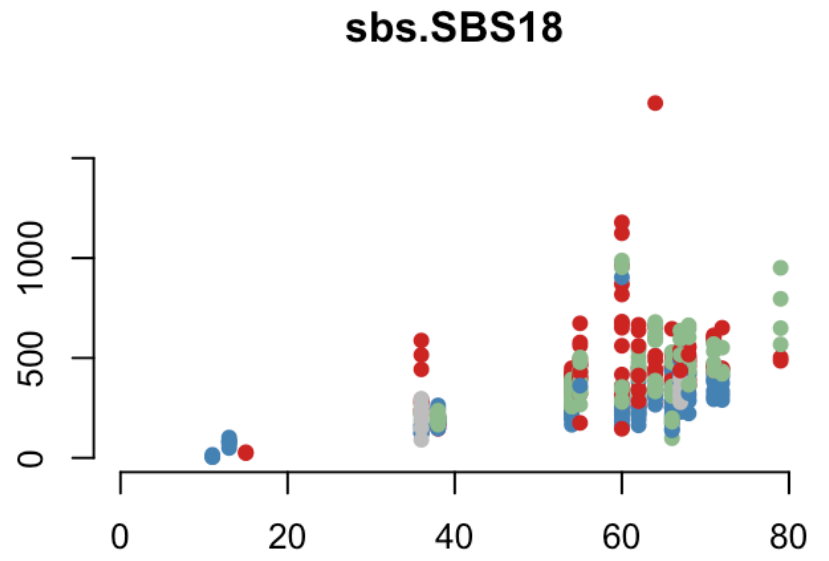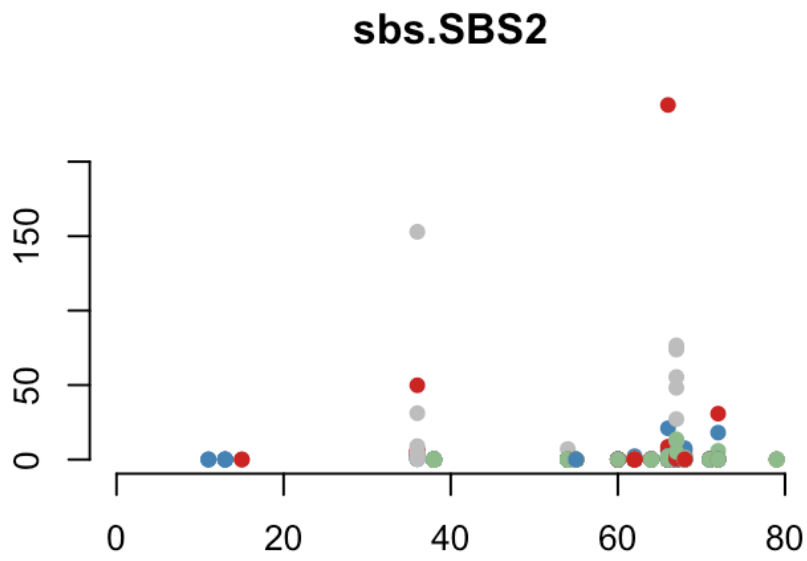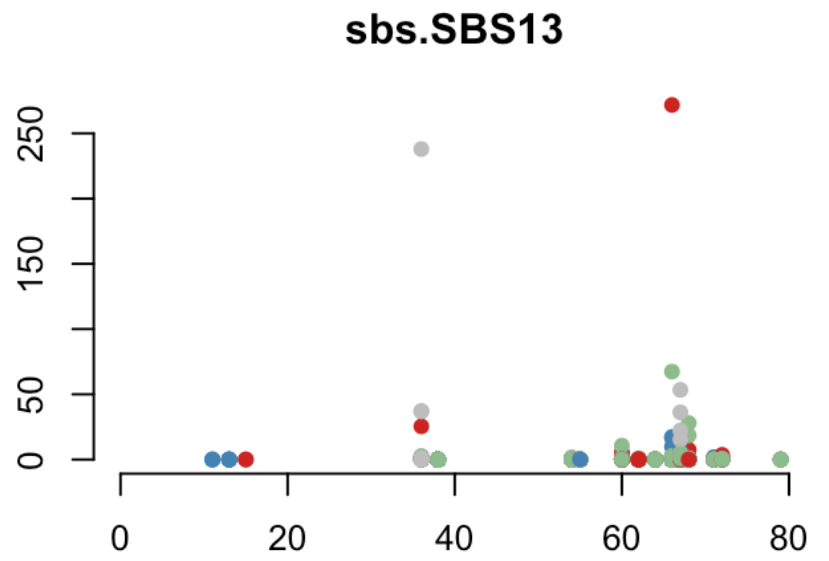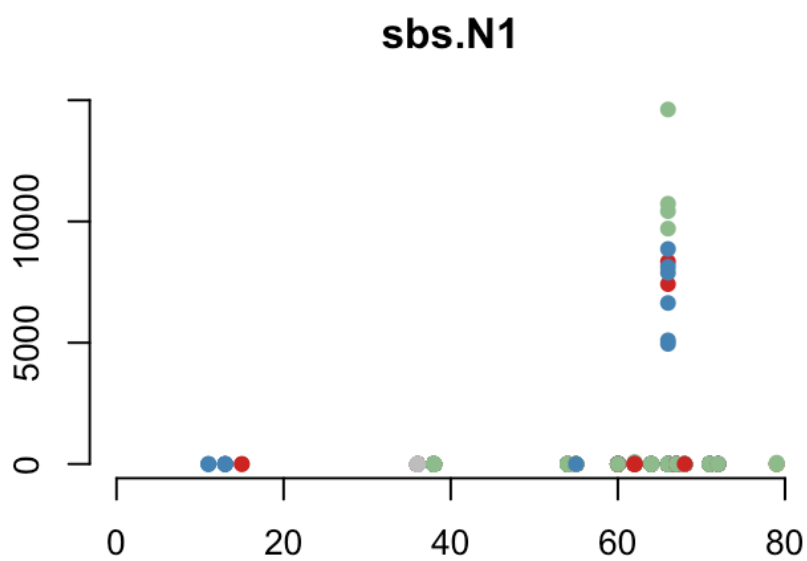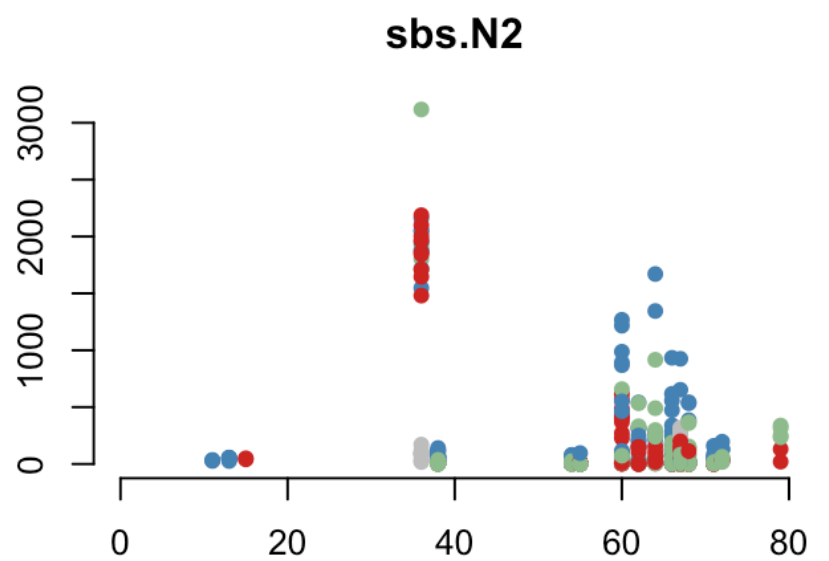

sbs.N3

sbs.N4

SBS.N3

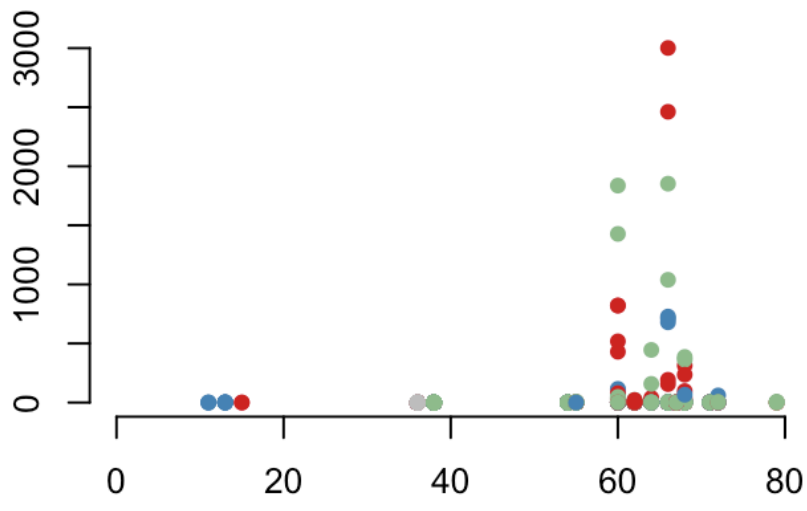

SBS.N4

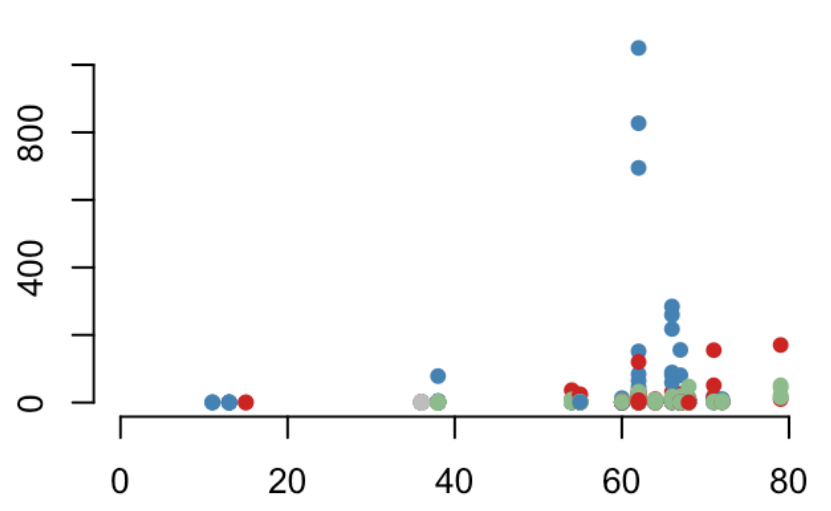

dbs.DB2

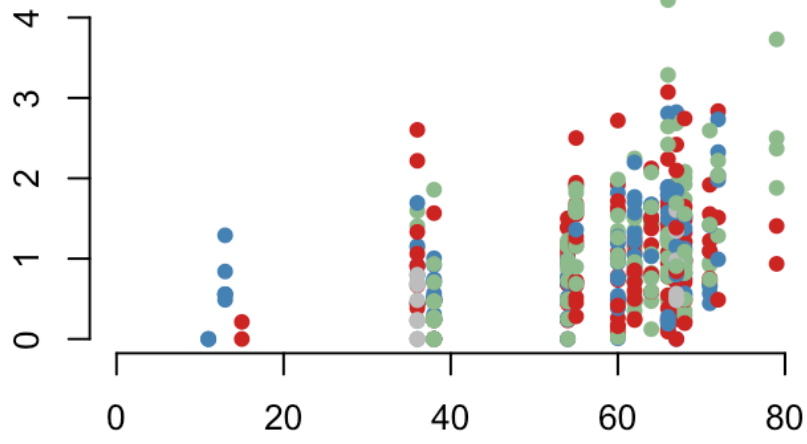

dbs.DB4

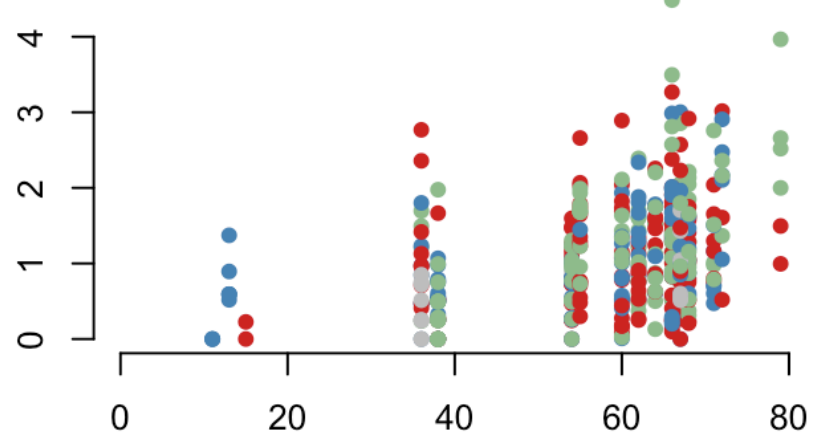

**dbs.DBS6**

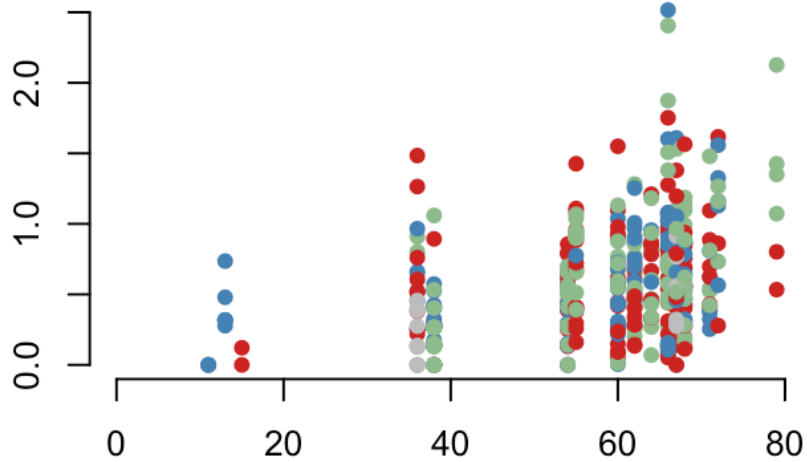

**dbs.DBS8**

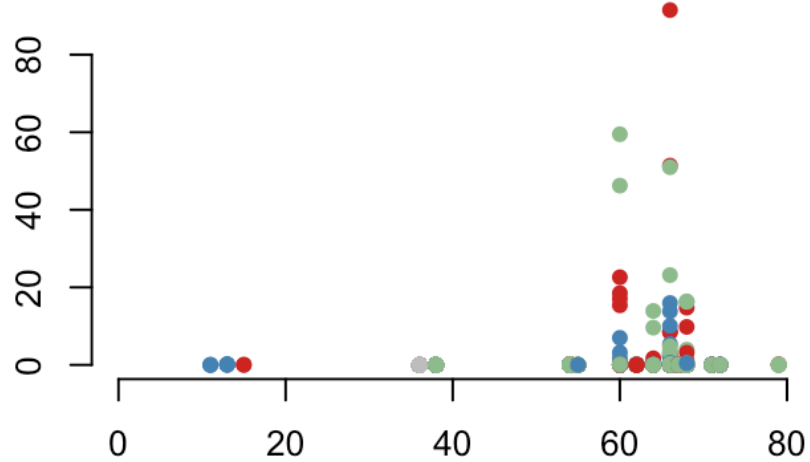

**dbs.DBS9**

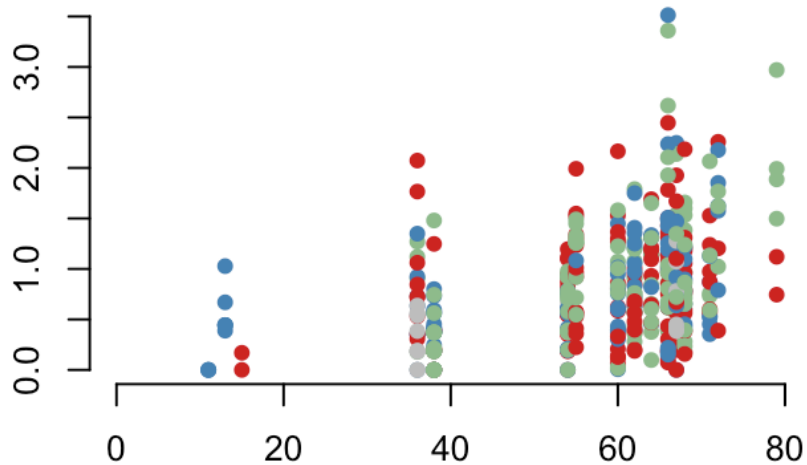

**dbs.DBS11**

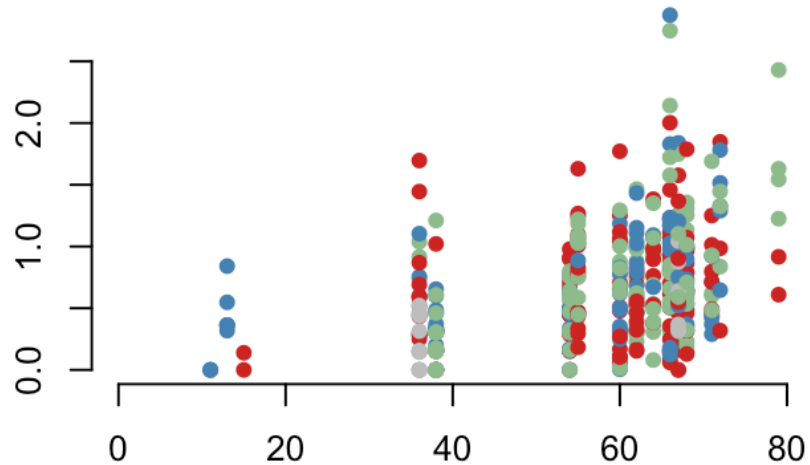

**id.ID1**

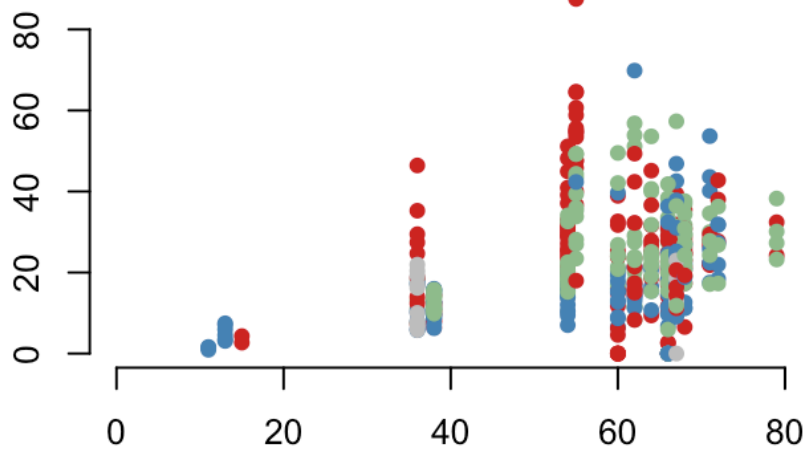

**id.ID2**

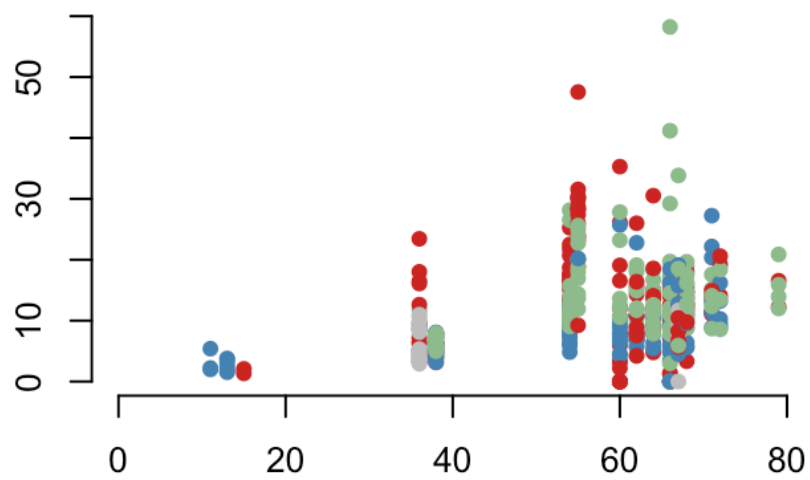

**id.ID5**

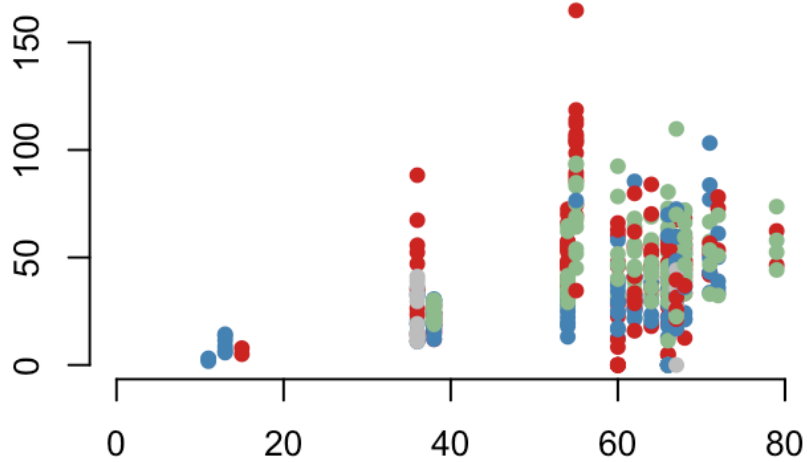

**id.N2**

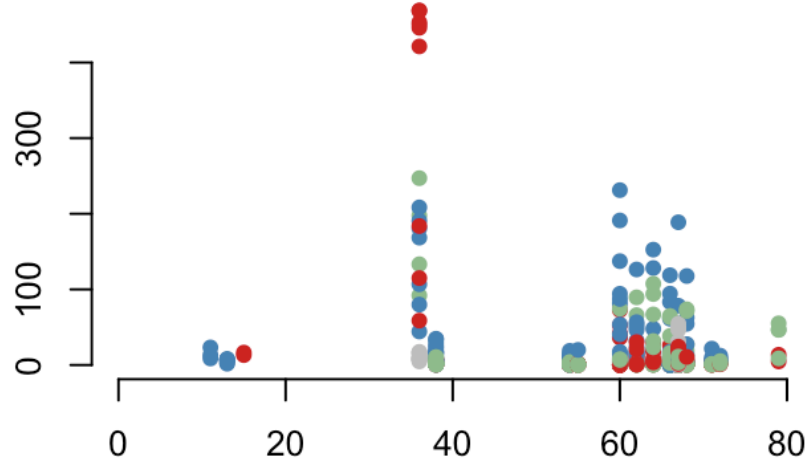



id.N3

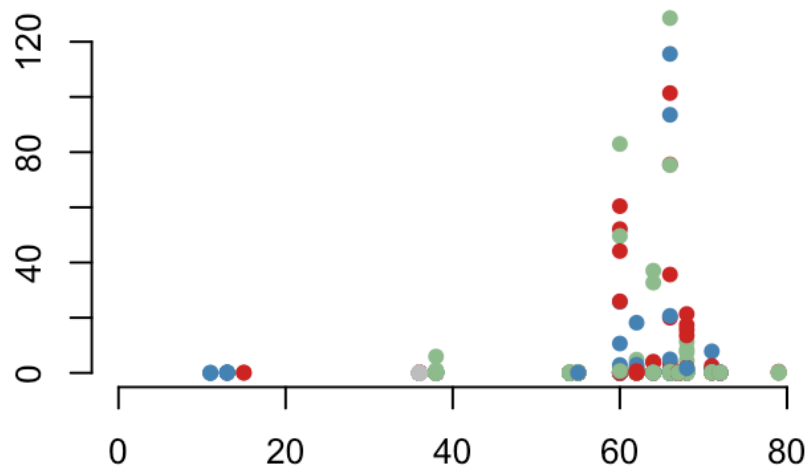

SVS

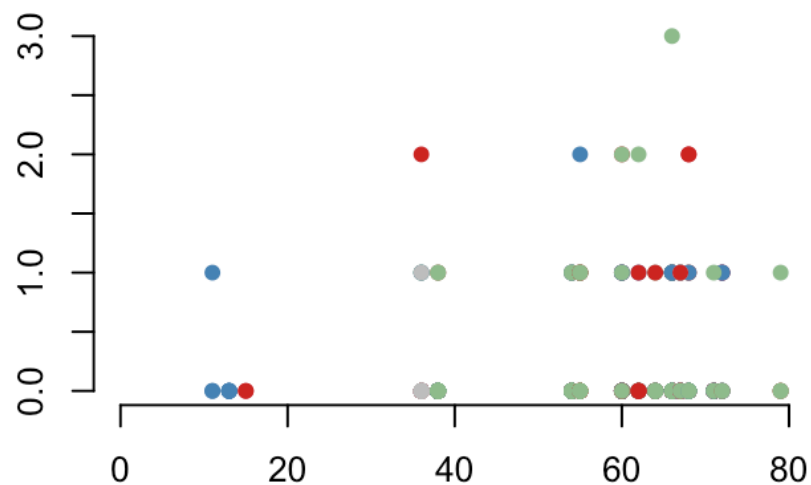

chromamps

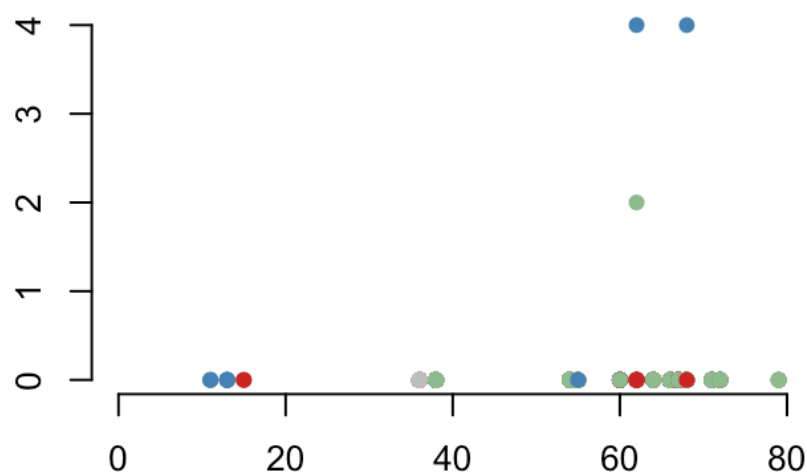

loh

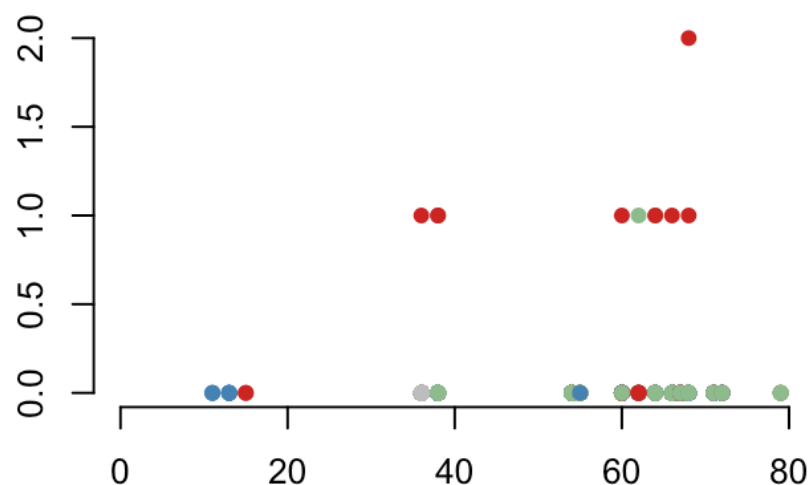

For the common signatures that have large numbers of mutations in most crypts I can fit a linear model.

Functions to fit each model:

```
cc$patSITE <- paste0(cc$patient, "_", cc$site)

# function needed for bootstrapping:
site_mutrate.fn <- function(model) {
  return(as.numeric(fixef(model)[c("age:siteIleum", "age:siteRight", "age:siteTransverse", "age:siteLeft")]))
}

# function to make colours transparent:
makeTransparent = function(..., alpha=0.4) {
  if(alpha<0 | alpha>1) stop("alpha must be between 0 and 1")
  alpha = floor(255*alpha)
  newColor = col2rgb(col=unlist(list(...)), alpha=FALSE)
  .makeTransparent = function(col, alpha) {
    rgb(red=col[1], green=col[2], blue=col[3], alpha=alpha, maxColorValue=255)
  }
  newColor = apply(newColor, 2, .makeTransparent, alpha=alpha)
  return(newColor)
}

fit_linear_model_fixed_site.fn <- function(signature) {
  print(signature)
}
```

```

if (grepl("sbs", signature)) {
  formula <- paste0(signature, " ~ age:site + vafdep + ((age-1)|patient)")
} else {
  formula <- paste0(signature, " ~ age:site + ((age-1)|patient)") # don't include vafdep in indel model as accounted for it better.
}

tlmer <- lmer(formula, data=cc, REML=F)

if (grepl("sbs", signature)) {
  formula_no_site <- paste0(signature, " ~ age + vafdep + ((age-1)|patient)")
} else {
  formula_no_site <- paste0(signature, " ~ age + ((age-1)|patient)") # don't include vafdep in indel model as accounted for it better.
}

tlmer_null <- lmer(formula_no_site, data=cc, REML=F)

print(anova(tlmer, tlmer_null, test="Chisq"))

# bootstrap
bootlml <- bootMer(tlmer, site_mutrate.fn, nsim=1000, use.u=TRUE, type="parametric")
cis <- as.data.frame(apply(bootlml$t, 2, function(col) quantile(col, probs=c(0.025, 0.5, 0.975))))
colnames(cis) <- c("age:siteIleum", "age:siteRight", "age:siteTransverse", "age:siteLeft")

# plot
plot(cc[,signature] ~ cc[, "age"], col=cc$sitecol, pch=16, xlim=c(0,80), ylab="Mutations", xlab="Patient age", main=signature)
abline(h=0, lty=2)
intercept <- summary(tlmer)$coef["(Intercept)", "Estimate"]
abline(intercept, summary(tlmer)$coef["age:siteIleum", "Estimate"], col=cc$sitecol[cc$site=="Ileum"][1], lwd=3)
abline(intercept, summary(tlmer)$coef["age:siteLeft", "Estimate"], col=cc$sitecol[cc$site=="Left"][1], lwd=3)
abline(intercept, summary(tlmer)$coef["age:siteTransverse", "Estimate"], col=cc$sitecol[cc$site=="Transverse"][1], lwd=3)
abline(intercept, summary(tlmer)$coef["age:siteRight", "Estimate"], col=cc$sitecol[cc$site=="Right"][1], lwd=3)
# add on confidence intervals
lciage90 <- cis["2.5%","age:siteTransverse"]*90 + intercept
uciage90 <- cis["97.5%","age:siteTransverse"]*90 + intercept
tcol=makeTransparent(cc$sitecol[cc$site=="Transverse"][1])
polygon(x=c(0,90,90,0), y=c(intercept,lciage90, uciage90, intercept), col=tcol, border=tcol)
lciage90 <- cis["2.5%","age:siteLeft"]*90 + intercept
uciage90 <- cis["97.5%","age:siteLeft"]*90 + intercept
tcol=makeTransparent(cc$sitecol[cc$site=="Left"][1])
polygon(x=c(0,90,90,0), y=c(intercept,lciage90, uciage90, intercept), col=tcol, border=tcol)
lciage90 <- cis["2.5%","age:siteRight"]*90 + intercept
uciage90 <- cis["97.5%","age:siteRight"]*90 + intercept

```

```

tcol=makeTransparent(cc$sitecol[cc$site=="Right"][1])
polygon(x=c(0,90,90,0), y=c(intercept,lciage90, uciage90, intercept), col=tcol,
border=tcol)
lciage90 <- cis["2.5%","age:siteIleum"]*90 + intercept
uciage90 <- cis["97.5%","age:siteIleum"]*90 + intercept
tcol=makeTransparent(cc$sitecol[cc$site=="Ileum"][1])
polygon(x=c(0,90,90,0), y=c(intercept,lciage90, uciage90, intercept), col=tcol,
border=tcol)
legend("topleft", lwd=2, col=c(cc$sitecol[cc$site=="Ileum"][1], cc$sitecol[cc$site=="Right"][1], cc$sitecol[cc$site=="Transverse"][1], cc$sitecol[cc$site=="Left"][1]),
),
legend=c(paste0("Ileum: ", signif(cis["50%","age:siteIleum"], digits=3), " (CI95
", signif(cis["2.5%","age:siteIleum"], digits=3), "-", signif(cis["97.5%","age:siteIleum"], digits=3), ")"),
paste0("Right: ", signif(cis["50%","age:siteRight"], digits=3), " (CI95 "
, signif(cis["2.5%","age:siteRight"], digits=3), "-", signif(cis["97.5%","age:siteRight"], digits=3), ")"),
paste0("Transverse: ", signif(cis["50%","age:siteTransverse"], digits=3),
" (CI95 ", signif(cis["2.5%","age:siteTransverse"], digits=3), "-", signif(cis["97.5%","age:siteTransverse"], digits=3), ")"),
paste0("Left: ", signif(cis["50%","age:siteLeft"], digits=3), " (CI95 ",
signif(cis["2.5%","age:siteLeft"], digits=3), "-", signif(cis["97.5%","age:siteLeft"], digits=3), ")"), btty="n")
}

```

```

totest <- c("sbs.SBS1", "sbs.SBS5", "sbs.SBS18", "id.ID1", "id.ID2", "id.ID5")

for (sig in totest) {
  fit_linear_model_fixed_site.fn(sig)
}

```

```

## [1] "sbs.SBS1"
## Data: cc
## Models:
## tlmer_null: sbs.SBS1 ~ age + vafdep + ((age - 1) | patient)
## tlmer: sbs.SBS1 ~ age:site + vafdep + ((age - 1) | patient)
##           Df      AIC      BIC  logLik deviance  Chisq Chi Df Pr(>Chisq)
## tlmer_null  5 5970.0 5990.5 -2980.0  5960.0
## tlmer       8 5845.3 5878.1 -2914.7  5829.3 130.74      3 < 2.2e-16 ***
## ---
## Signif. codes:  0 '***' 0.001 '**' 0.01 '*' 0.05 '.' 0.1 ' ' 1

```

# sbs.SBS1

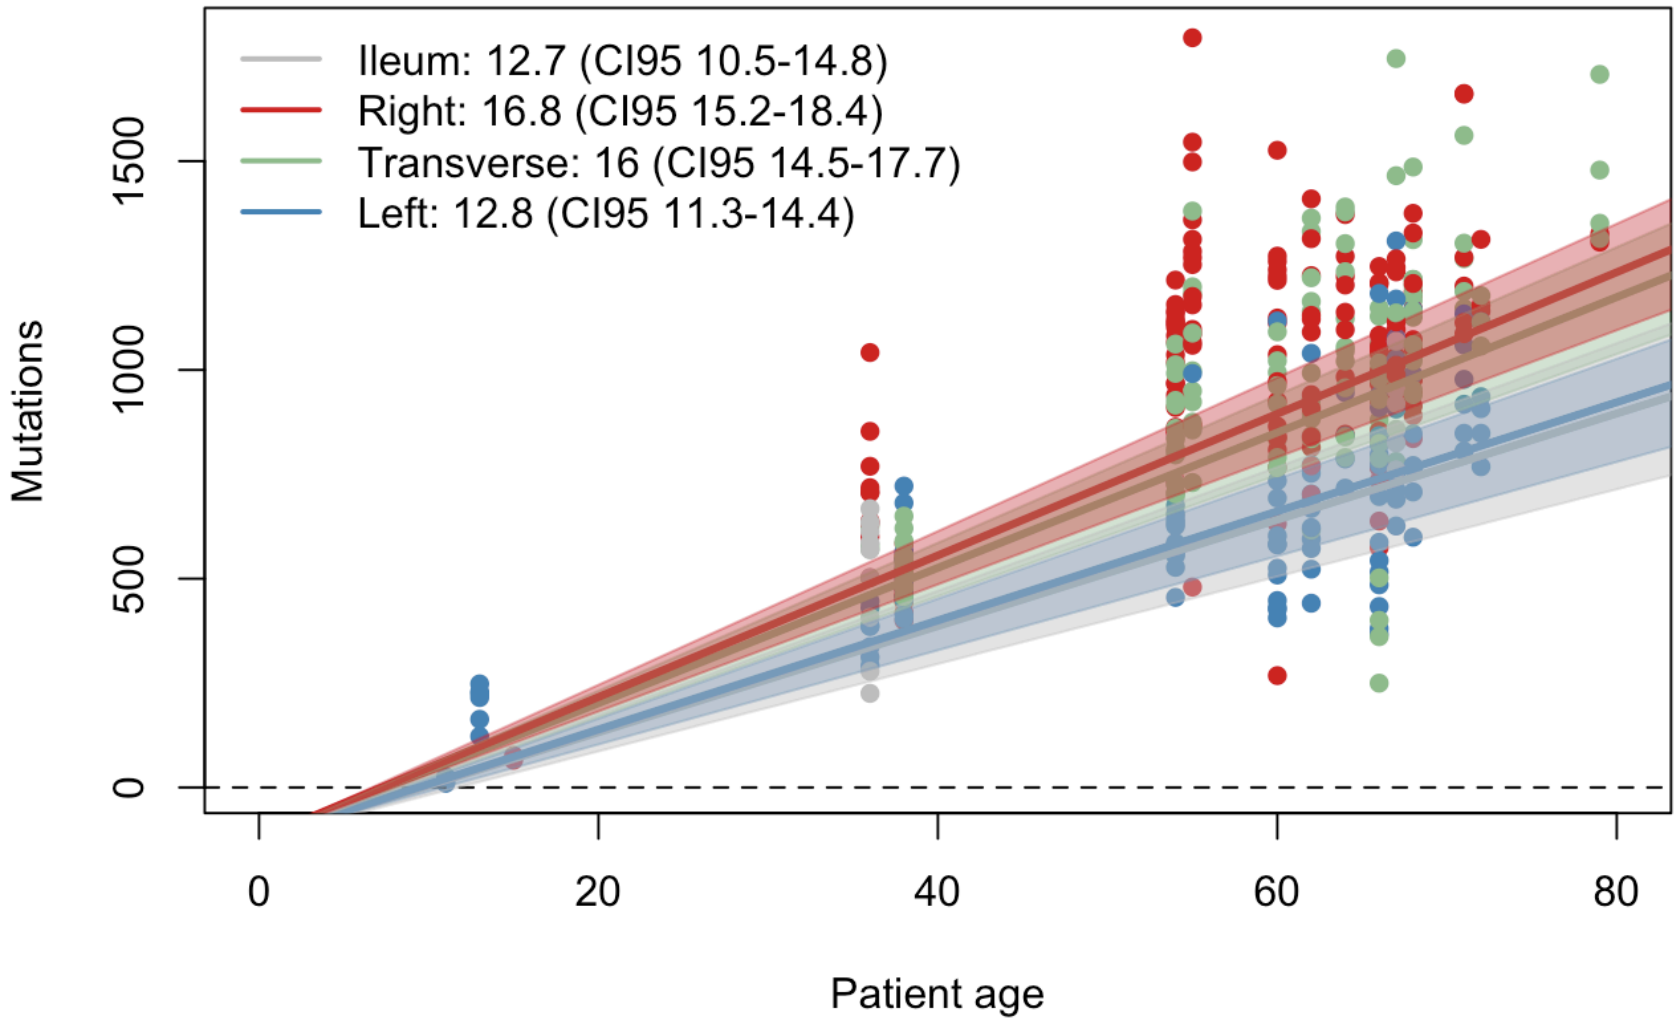

```
## [1] "sbs.SBS5"  
## Data: cc  
## Models:  
## tlmer_null: sbs.SBS5 ~ age + vafdep + ((age - 1) | patient)  
## tlmer: sbs.SBS5 ~ age:site + vafdep + ((age - 1) | patient)  
##           Df    AIC    BIC  logLik deviance  Chisq Chi Df Pr(>Chisq)  
## tlmer_null  5 6174.3 6194.8 -3082.2  6164.3  
## tlmer       8 6057.6 6090.4 -3020.8  6041.6 122.74      3 < 2.2e-16 ***  
## ---  
## Signif. codes:  0 '***' 0.001 '**' 0.01 '*' 0.05 '.' 0.1 ' ' 1
```

## sbs.SBS5

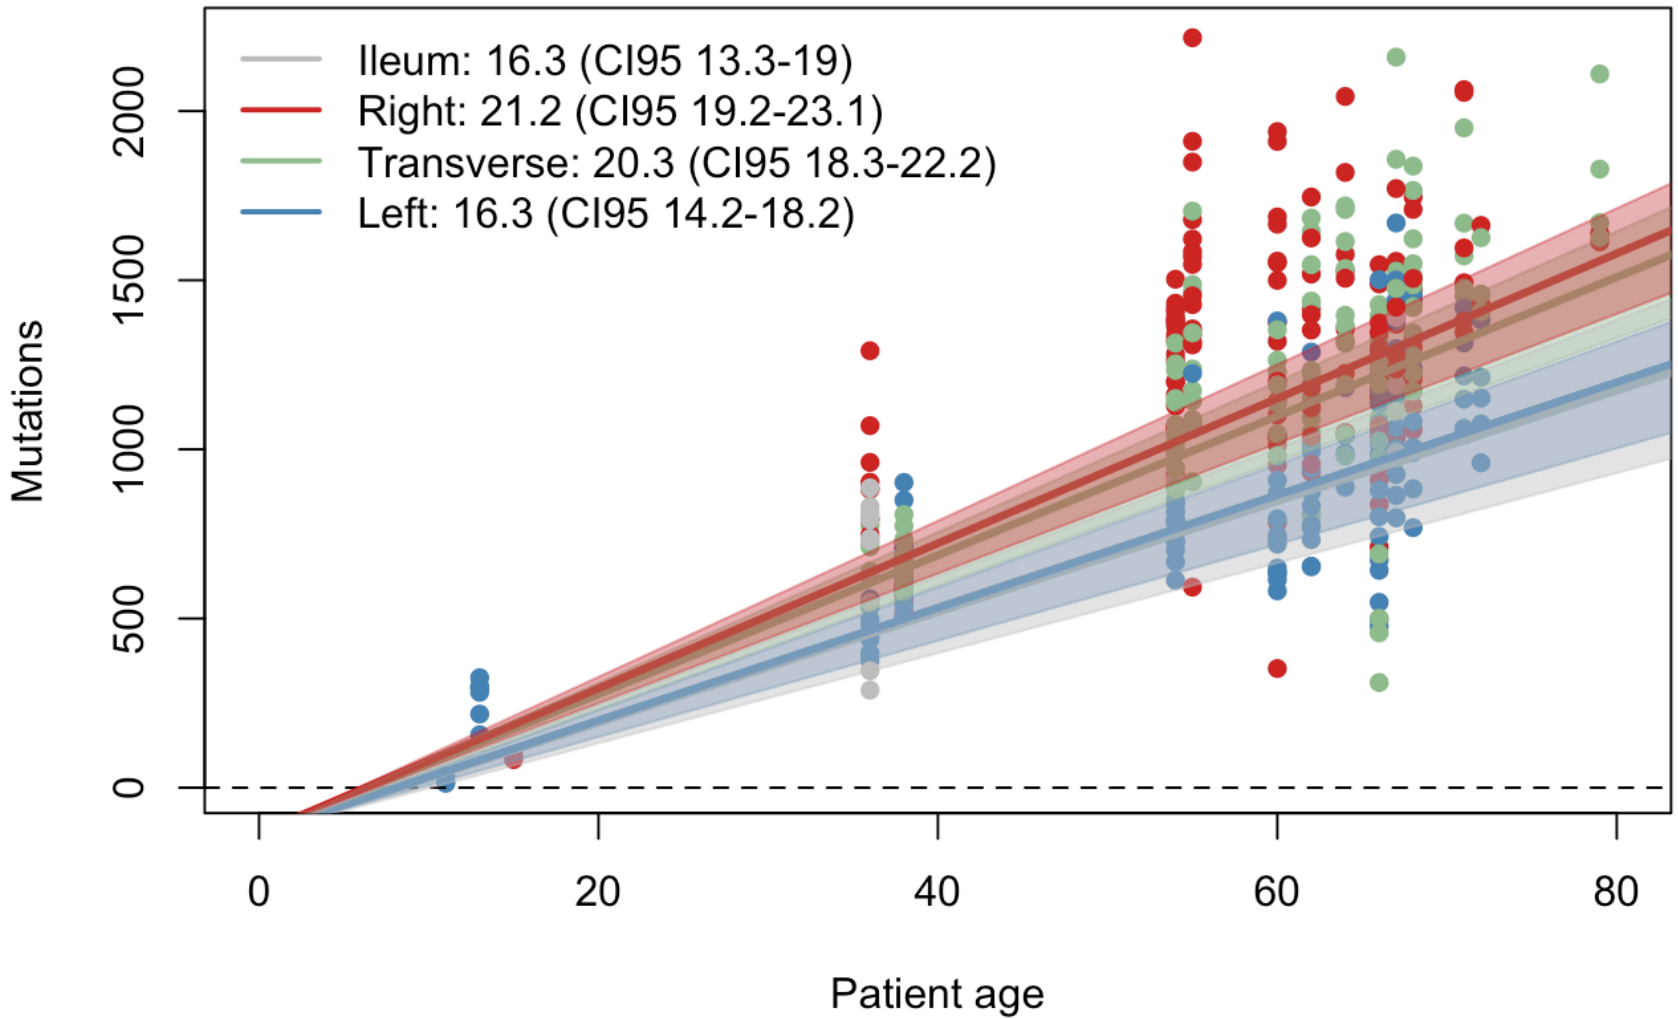

```
## [1] "sbs.SBS18"
## Data: cc
## Models:
## tlmer_null: sbs.SBS18 ~ age + vafdep + ((age - 1) | patient)
## tlmer: sbs.SBS18 ~ age:site + vafdep + ((age - 1) | patient)
##           Df    AIC    BIC  logLik deviance  Chisq Chi Df Pr(>Chisq)
## tlmer_null  5 5512.9 5533.4 -2751.4  5502.9
## tlmer       8 5414.0 5446.8 -2699.0  5398.0 104.92      3 < 2.2e-16 ***
## ---
## Signif. codes:  0 '***' 0.001 '**' 0.01 '*' 0.05 '.' 0.1 ' ' 1
```

# sbs.SBS18

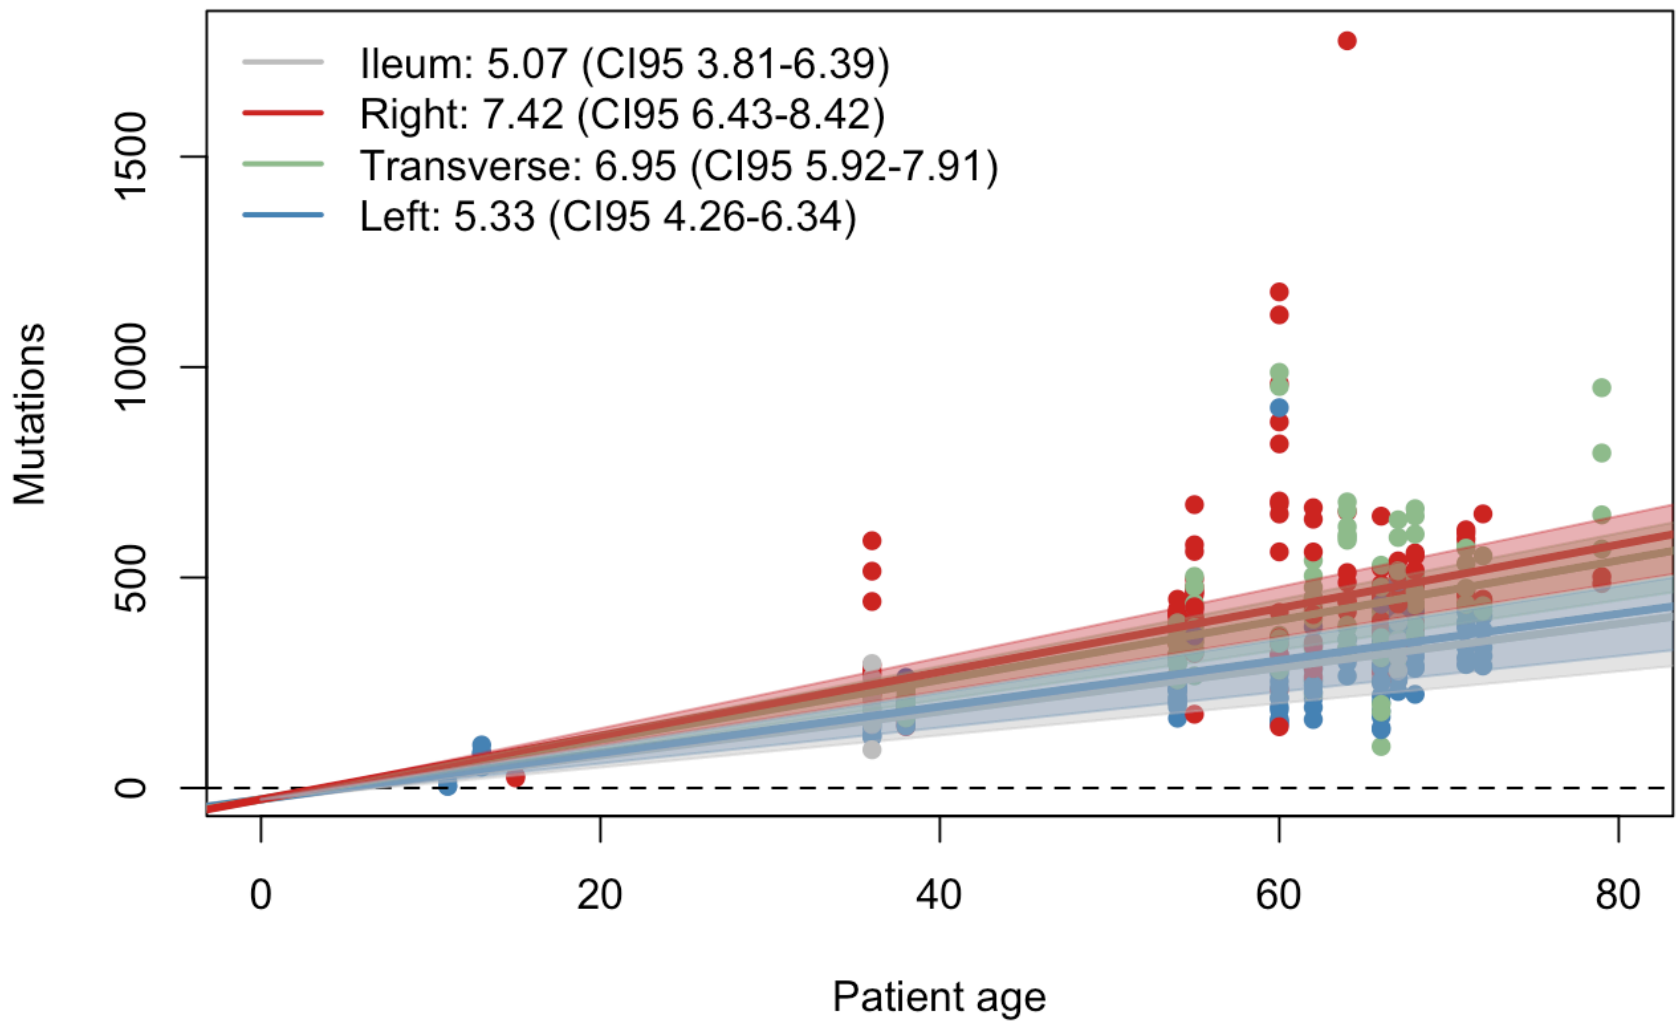

```
## [1] "id.ID1"  
## Data: cc  
## Models:  
## tlmer_null: id.ID1 ~ age + ((age - 1) | patient)  
## tlmer: id.ID1 ~ age:site + ((age - 1) | patient)  
##           Df    AIC    BIC  logLik deviance  Chisq Chi Df Pr(>Chisq)  
## tlmer_null  4 3265.7 3282.1 -1628.8  3257.7  
## tlmer       7 3246.8 3275.5 -1616.4  3232.8 24.845      3 1.664e-05 ***  
## ---  
## Signif. codes:  0 '***' 0.001 '**' 0.01 '*' 0.05 '.' 0.1 ' ' 1
```

# id.ID1

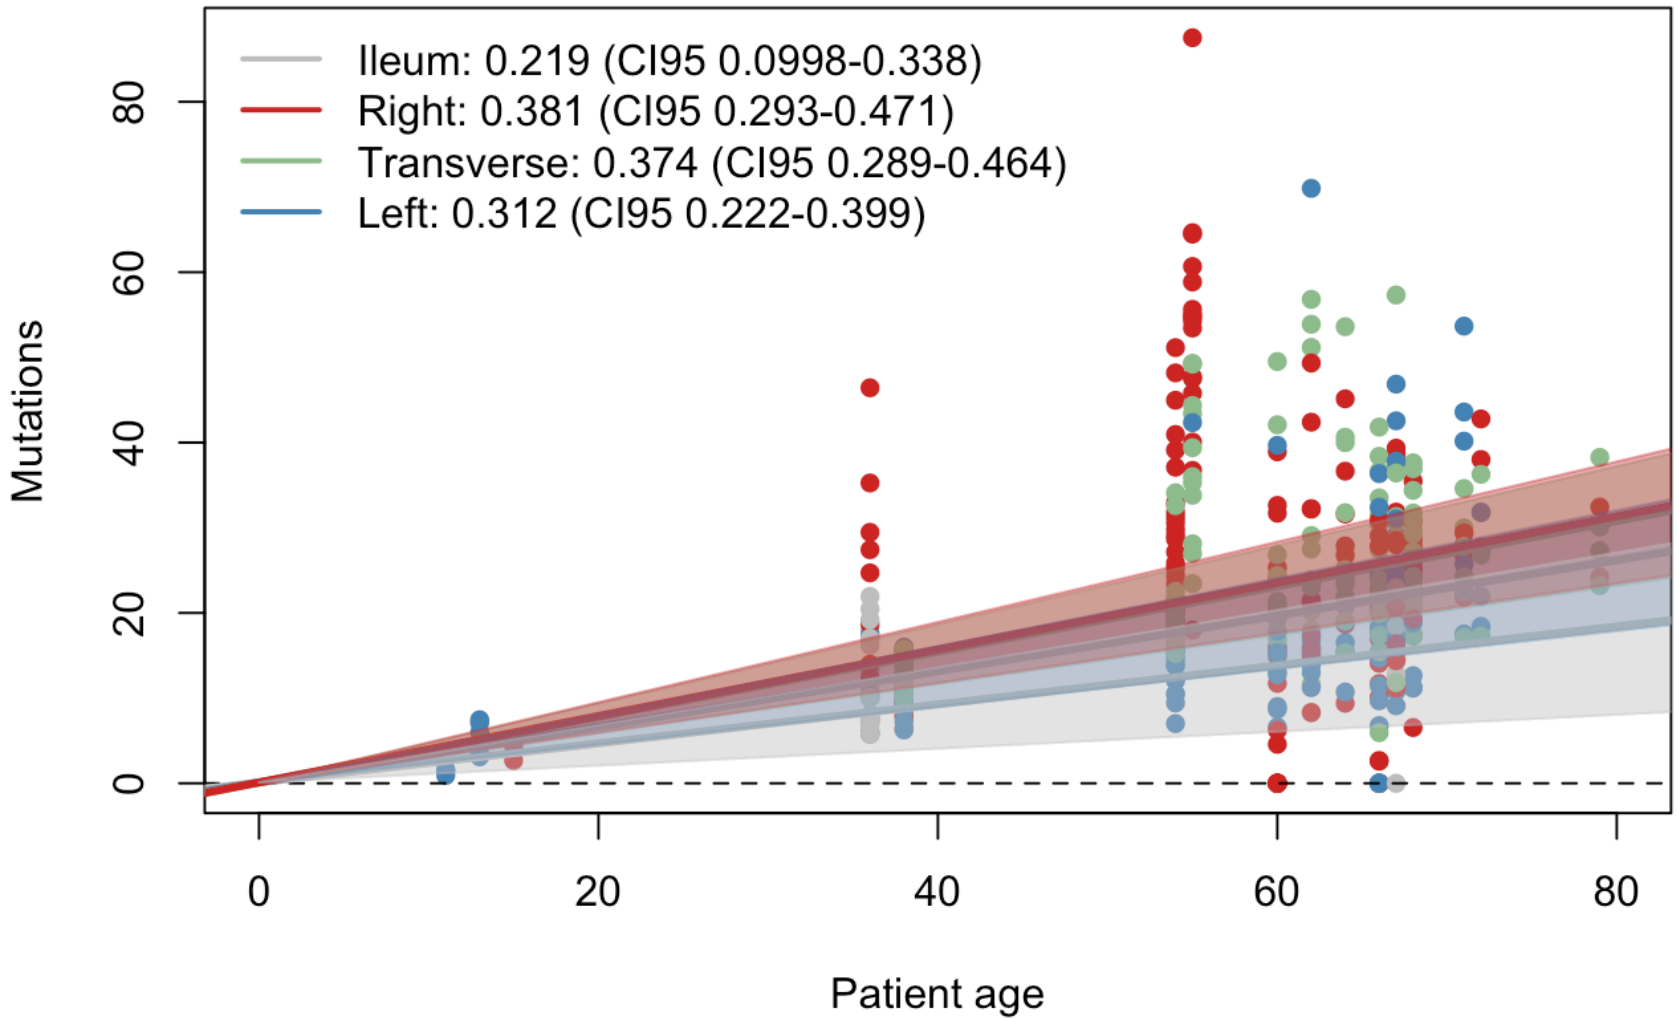

```
## [1] "id.ID2"  
## Data: cc  
## Models:  
## tlmer_null: id.ID2 ~ age + ((age - 1) | patient)  
## tlmer: id.ID2 ~ age:site + ((age - 1) | patient)  
##           Df    AIC    BIC  logLik deviance  Chisq Chi Df Pr(>Chisq)  
## tlmer_null  4 2839.8 2856.1 -1415.9  2831.8  
## tlmer       7 2816.8 2845.5 -1401.4  2802.8 28.977      3 2.265e-06 ***  
## ---  
## Signif. codes:  0 '***' 0.001 '**' 0.01 '*' 0.05 '.' 0.1 ' ' 1
```

# id.ID2

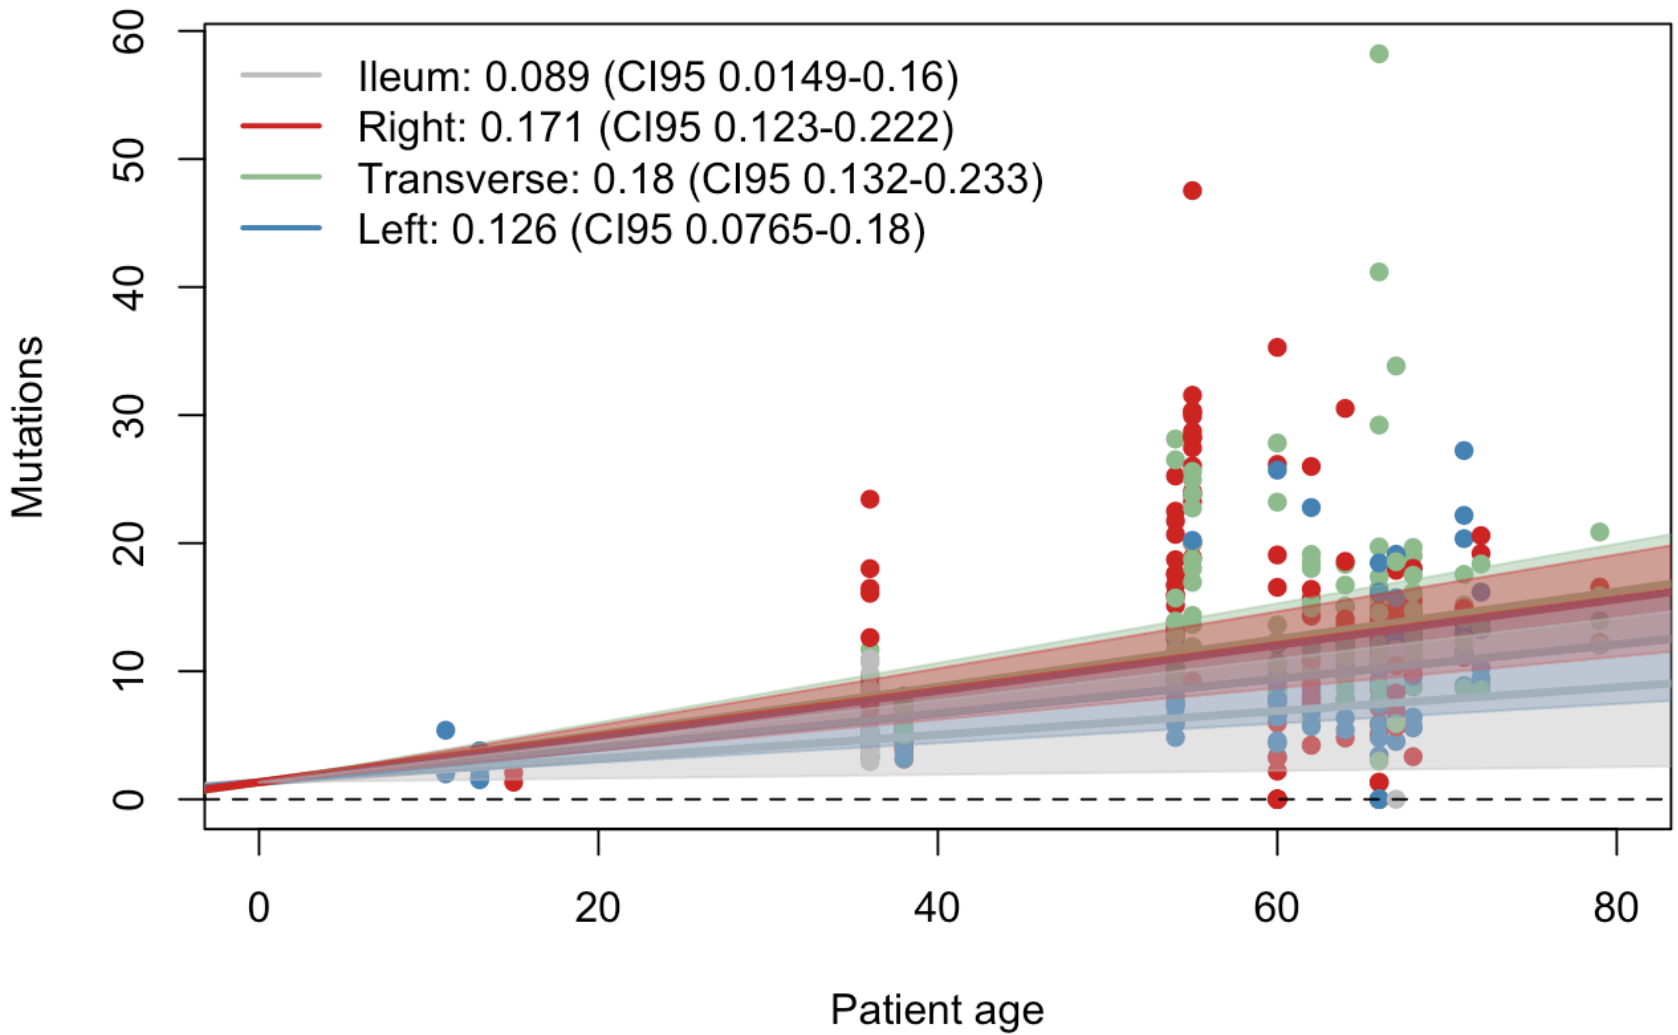

```
## [1] "id.ID5"  
## Data: cc  
## Models:  
## tlmer_null: id.ID5 ~ age + ((age - 1) | patient)  
## tlmer: id.ID5 ~ age:site + ((age - 1) | patient)  
##           Df    AIC    BIC  logLik deviance  Chisq Chi Df Pr(>Chisq)  
## tlmer_null  4 3764.4 3780.8 -1878.2  3756.4  
## tlmer       7 3741.1 3769.8 -1863.5  3727.1 29.294      3 1.942e-06 ***  
## ---  
## Signif. codes:  0 '***' 0.001 '**' 0.01 '*' 0.05 '.' 0.1 ' ' 1
```



## id.ID5

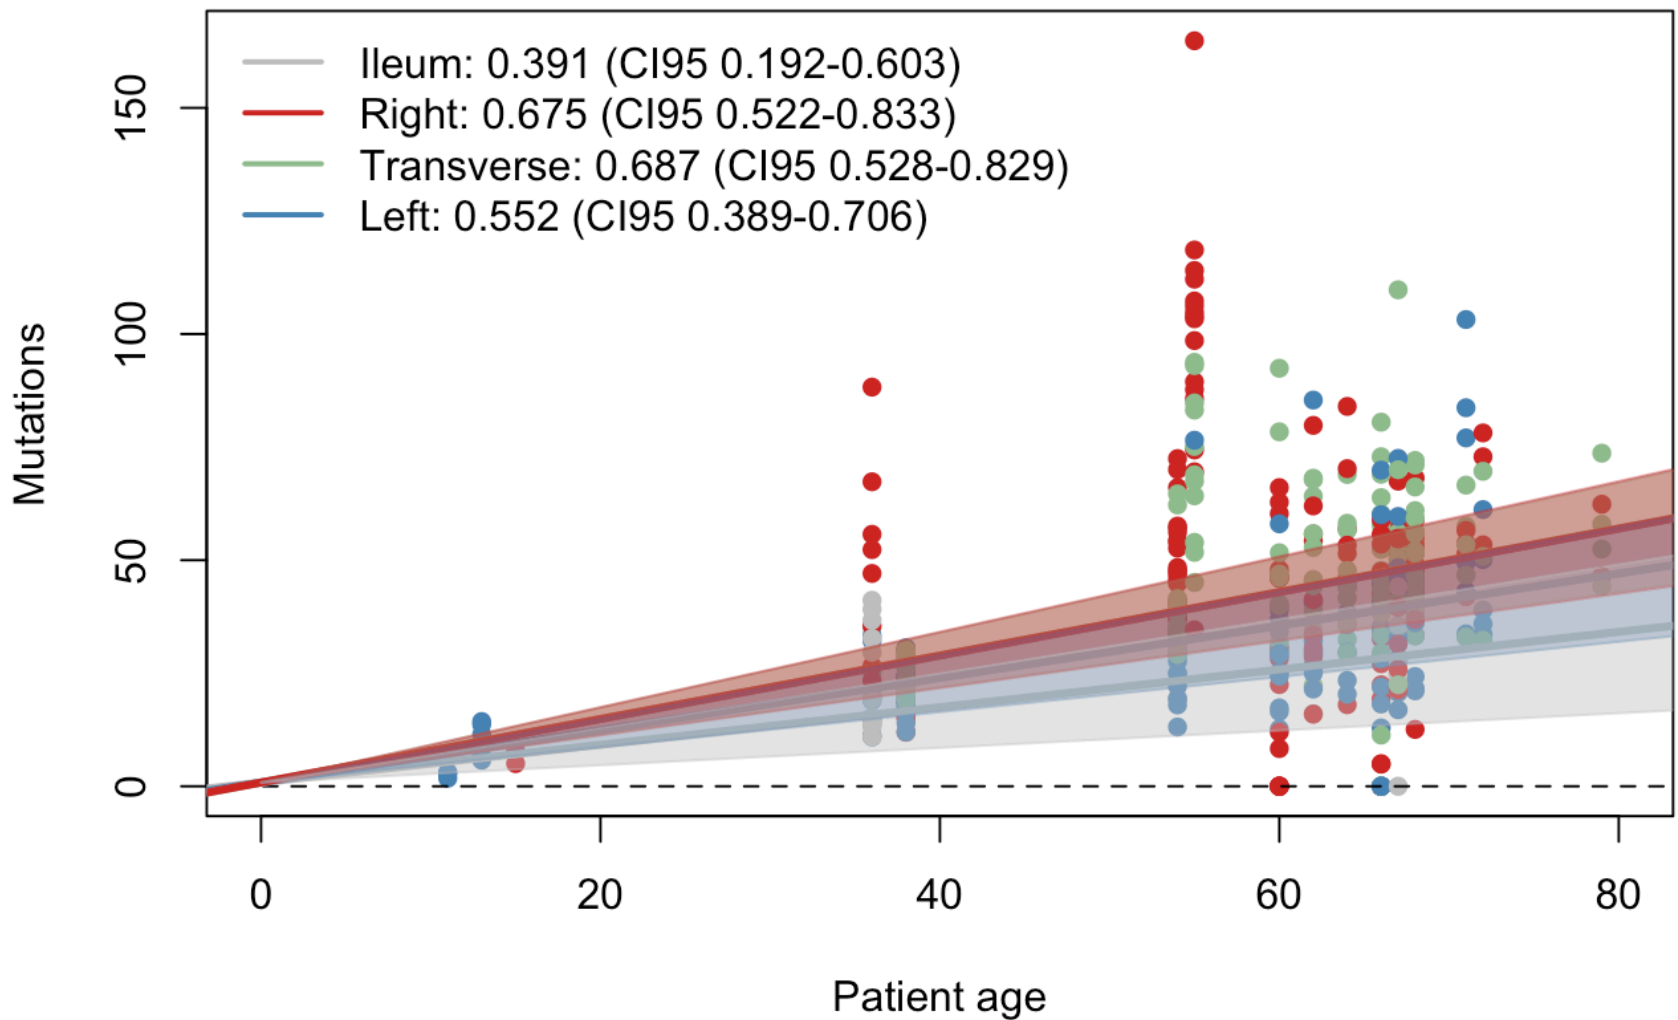

### 3) Time copy number changes.

Give path to copy number files.

```
cnpath <- "/Users/hl11/Documents/Projects/normal_colon/WGS_results/2018.07.02_signature_results/hdp_sigs_to_pcawg_sigs_by_em/modelling_august_2018/MutationTimer/"  
  
ascats <- list.files(path=paste0(cnpath, "/ascat_files"), pattern="ascat_ngs.summary.csv")
```

For each of these ascat (copy number files), read in the relevant file of substitutions with their allele fractions. Then use the MutationTimeR package to estimate the time of the copy number change.

```

dd <- data.frame()
for (asc in ascats) {
  patient <- sapply(strsplit(asc, '\\. '), "[[", 1)
  cav <- list.files(path=paste0(cnpath, "/filtered_caveman_files/"), pattern=paste0(patient, ".caveman_c.annot.vcf"))

  vcf <- readVcf(paste0(cnpath, "/filtered_caveman_files/", cav))
  bbin <- read.csv(paste0(cnpath, "/ascat_files/", asc), stringsAsFactors = F, header=F, row.names = 1)
  colnames(bbin) <- c("Chrom", "Start", "End", "Norm_tot", "Norm_min", "Tum_tot", "Tum_min")
  bbin$Norm_tot <- NULL
  bbin$Norm_min <- NULL
  bbin$Tum_maj <- bbin$Tum_tot - bbin$Tum_min

  vv <- read.csv(paste0(cnpath, "/filtered_caveman_files/", cav), sep="\t", header=T, skip = 136) # work out the clonality of the sample
  vv$pm <- as.numeric(sapply(strsplit(as.character(vv$TUMOUR), ":"), "[[", 10))

  dip <- bbin[bbin$Tum_tot==2 & bbin$Tum_maj==1,] # only look at the diploid segments.
  dipsubs <- data.frame()
  for (j in 1:nrow(dip)) {
    td <- dip[j,]
    vv$X.CHROM<-as.character(vv$X.CHROM)
    vv$POS<-as.numeric(as.character(vv$POS))
    vd <- vv[vv$X.CHROM==td$Chrom & vv$POS >= td$Start & vv$POS<= td$End,]
    dipsubs <- as.data.frame(rbind(dipsubs, vd))
  }
  bbin$purity <- median(dipsubs$pm, col="grey", 50)*2

  bb <- GRanges(bbin$Chrom, IRanges(bbin$Start, bbin$End), major_cn=bbin$Tum_maj ,
  minor_cn=bbin$Tum_min, clonal_frequency=bbin$purity)

  mt <- MutationTimeR::mutationTime(vcf, bb)

  aa <- as.data.frame(cbind(bbin, mt$T))
  aa <- aa[!is.na(aa$type) & !is.na(aa$time),]

  if (nrow(aa)>0) {
    aa$crypt <- patient
    dd <- as.data.frame(rbind(dd, aa))
    write.table(aa, paste0(cnpath, "/output/", patient, "_segment_times.txt"), sep="\t", col.names = T, row.names=F)
  }
}

```

Only keep the ones with >100 mutations per segment that we can time with high confidence.

```
ee <- dd[dd$n.snv_mnv>100 & !is.na(dd$n.snv_mnv),]
```

Now need to add on the ages.

```

ages <- read.csv(paste0(cnpath, "/age_info.txt"), sep="\t", header=T, stringsAsFactors = F)

ff <- merge(ee, ages, all.x=T, all.y=F)
ff$cnage <- ff$age*ff$time
ff$cnage_lo <- ff$age*ff$time.lo
ff$cnage_up <- ff$age*ff$time.up

ff[,c('crypt', "Chrom", "Start", "End", "Tum_tot", "Tum_min", "Tum_maj", "purity",
"type", "age", "cnage", "cnage_lo", "cnage_up", "n.snv_mnv")]

```

```

##          crypt Chrom   Start      End Tum_tot Tum_min Tum_maj purity
## 1 PD36814c6      3   60197 197908615      3      1      2   0.58
## 2 PD36814l7      3   60197 197908615      4      2      2   1.00
## 3 PD37226e5      7   24220 159127076      4      2      2   0.86
## 4 PD37226e5      X 2699555 154929412      4      2      2   0.86
## 5 PD37226m5      7   24220 159127076      4      2      2   0.86
##
##          type age   cnage  cnage_lo cnage_up n.snv_mnv
## 1 Mono-allelic Gain   64 19.87235  7.623973 32.43707      184
## 2 Bi-allelic Gain (WGD) 68 31.15109 23.702204 38.04505      283
## 3 Bi-allelic Gain (WGD) 68 51.11889 43.349747 56.37321      164
## 4 Bi-allelic Gain (WGD) 68 50.15287 44.699405 54.89750      251
## 5 Bi-allelic Gain (WGD) 62 49.88222 42.542479 54.88502      127

```

Plot the age at which the copy number change occurs, showing the 95% confidence interval.

```

ff$colour <- "firebrick3"
ff$colour[ff$Tum_min==2] <- "darkred"

par(mfrow=c(1,1))
par(mar=c(4,4,4,1))
plot(ff$cnage, xaxt="n", xlab="chromosome", ylim=c(0, 80), ylab="Time (years)",
      col=ff$colour, pch=16, cex=1.5, main="Timing of copy number changes")
for (i in 1:nrow(ff)) {
  segments(x0=i , y0=ff$cnage_lo[i], x1=i , y1=ff$cnage_up[i], col=ff$colour[i], lwd=2)
}
points(ff$age, col="black", pch=18, cex=1.5)
axis(side=1, at=c(1:nrow(ff)), labels = ff$Chrom)
legend('bottomright', pch=c(16,16,18), col=c("darkred", "firebrick3", "black"), legend=c("2+2", "2+1", "Patient age"), bty="n")
text(x=3.5, y=30, "Same crypt", col="black")
segments(x0 = 3, x1=4, y0=35, y1=35, col="darkgrey", lwd=2)
segments(x0 = 3, x1=3, y0=35, y1=40, col="darkgrey", lwd=2)
segments(x0 = 4, x1=4, y0=35, y1=40, col="darkgrey", lwd=2)
segments(x0 = 3.5, x1=3.5, y0=32, y1=35, col="darkgrey", lwd=2)

```

## Timing of copy number changes

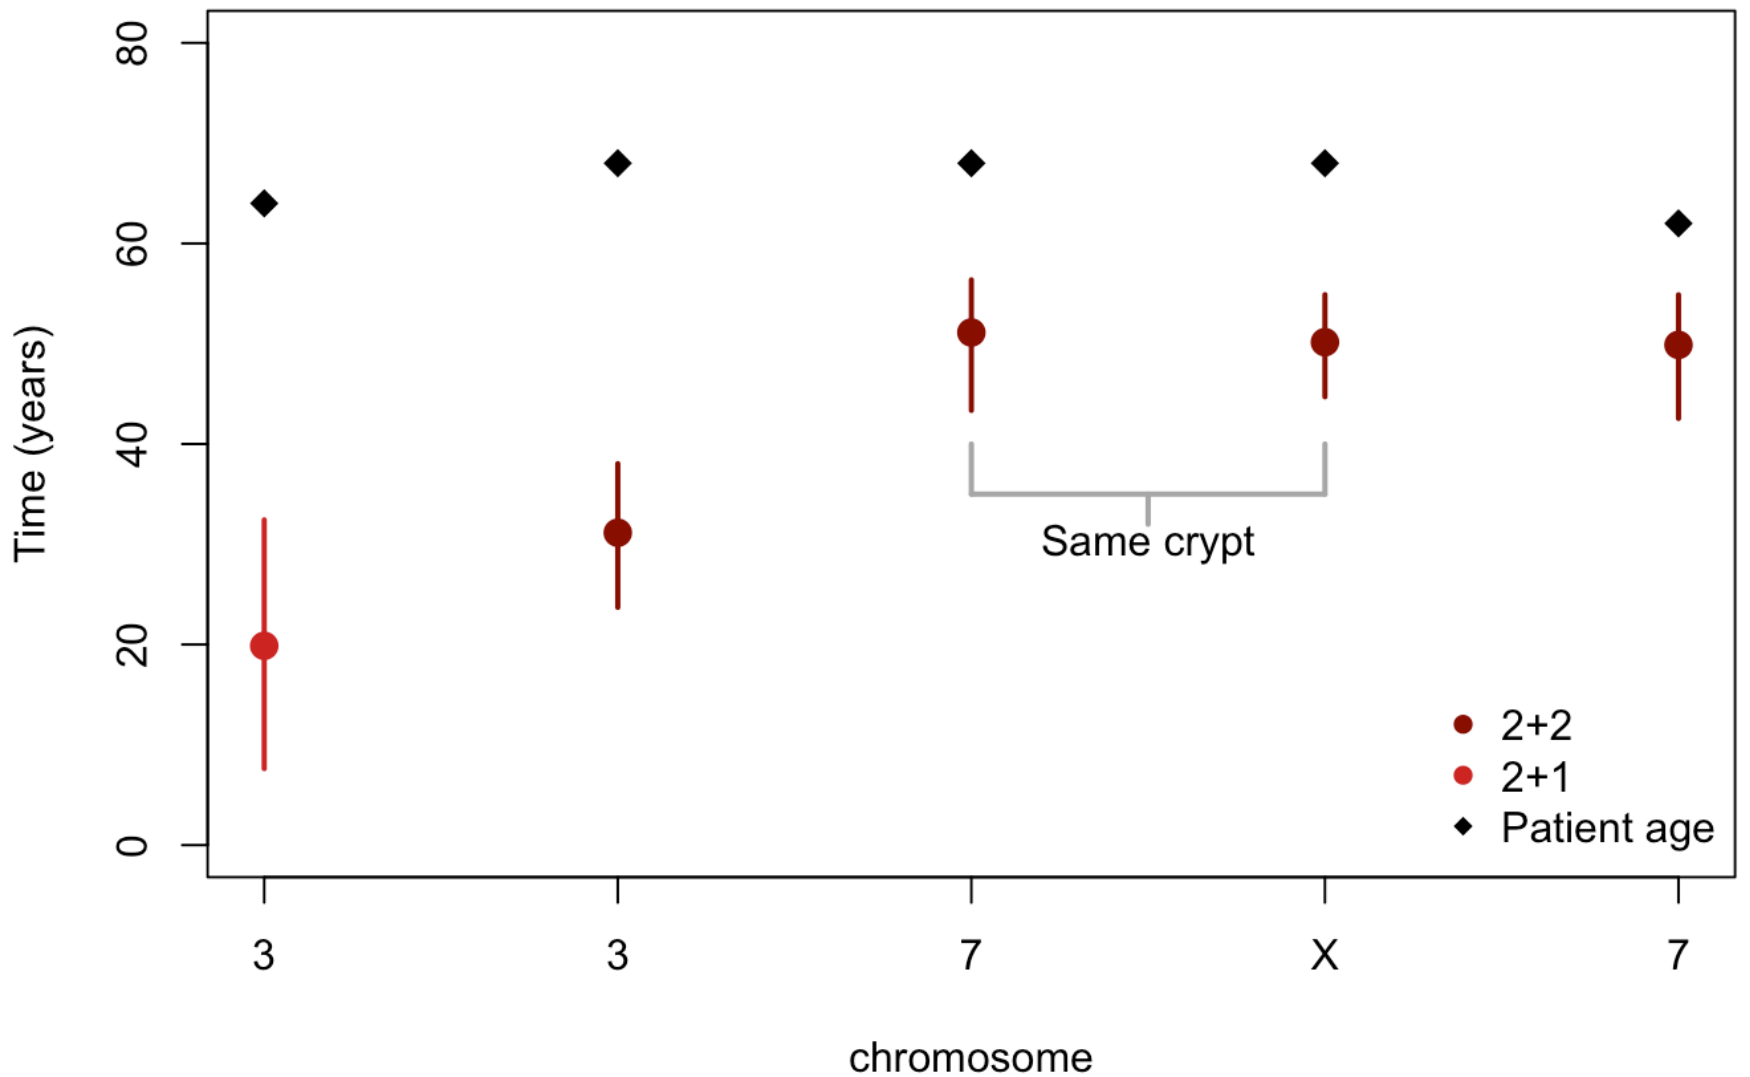

## 4) dNdS for driver mutation discovery.

Two analyses: a) Whole genome sequencing samples only, considering the whole genome. b) Combined genomes and targeted data, considering only 90 colorectal cancer genes curated from the literature that were included in our baitset.

Read in data.

```
comb <- read.csv("/Users/hl11/Documents/Projects/normal_colon/WGS_results/2018.03.19_drivers/combined_dnds_input_targ_wgs.txt", sep="\t", header=T, stringsAsFactors = F)
str(comb)
```

```
## 'data.frame': 23039 obs. of 10 variables:
## $ sampleID: chr "HLS_1C_30_B5" "HLS_1C_30_B5" "HLS_1C_30_B5" "HLS_1C_30_B5" .
..
## $ chr : chr "1" "1" "1" "1" ...
## $ pos : int 65330632 155883970 158262062 158669869 200378047 203683366 24
8129571 6422622 14990481 60563086 ...
## $ ref : chr "T" "TG" "G" "G" ...
## $ mut : chr "G" "T" "A" "A" ...
## $ source : chr "wgs" "wgs" "wgs" "wgs" ...
## $ patient : chr "HL" "HL" "HL" "HL" ...
## $ patkey : chr "HL_1_65330632_T_G" "HL_1_155883970_TG_T" "HL_1_158262062_G_A
" "HL_1_158669869_G_A" ...
## $ plus1 : int 65330633 155883971 158262063 158669870 200378048 203683367 24
8129572 6422623 14990482 60563087 ...
## $ tonext : int 155883970 158262062 158669869 200378047 203683366 248129571 6
422622 14990481 60563086 64039174 ...
```

```
wgs <- comb[comb$source=="wgs",]
```

Read in the set of colorectal cancer genes covered by the baitset.

```
genes <- read.csv("/Users/hl11/Documents/Projects/normal_colon/WGS_results/2018.03
.19_drivers/driver_genes_in_baitset.txt", sep="\t", header=F, stringsAsFactors = F
)
genes <- genes$V1
genes
```

```
## [1] "ACVR1B" "ACVR2A" "APC" "ARID1A" "ARID2" "ASXL1" "ATM"
## [8] "ATR" "ATRX" "AXIN2" "BCOR" "BRAF" "BRCA2" "CARD11"
## [15] "CBL" "CDC73" "CDH1" "CDK12" "CREBBP" "CTNNB1" "EGFR"
## [22] "ELF3" "EP300" "ERBB2" "ERBB3" "EZH2" "AMER1" "FBXW7"
## [29] "FGFR1" "FGFR2" "FLT1" "GATA3" "GNAS" "H3F3A" "H3F3B"
## [36] "JAK2" "KDM6A" "KDR" "KIT" "KRAS" "MET" "MGA"
## [43] "MLH1" "KMT2D" "KMT2C" "MSH2" "MSH6" "NF1" "NF2"
## [50] "NRAS" "PDGFRA" "PIK3CA" "PIK3R1" "POLE" "PTCH1" "PTEN"
## [57] "PTPN11" "RB1" "RBM10" "RET" "RNF43" "SETD2" "SMAD2"
## [64] "SMAD4" "SOX9" "STAG2" "STK11" "TBX3" "TCF7L2" "TGFB2"
## [71] "TP53" "TSHR" "VHL" "WT1" "AKT1" "AXIN1" "B2M"
## [78] "CDKN1B" "CSF1R" "CUX1" "GRIN2A" "MAP2K1" "MAP2K4" "MAX"
## [85] "QKI" "RAD21" "ROBO2" "SRC" "TBL1XR1" "UBR5"
```

#### a. Whole genome analysis

```
wgsout <- dndscv(wgs)
```

```
## [1] Loading the environment...
```

```
## [2] Annotating the mutations...
```

```
## Warning in dndscv(wgs): Same mutations observed in different sampleIDs.  
## Please verify that these are independent events and remove duplicates  
## otherwise.
```

```
## Note: 6 mutations removed for exceeding the limit of mutations per gene per  
sample
```

```
## 51 %...
```

```
## [3] Estimating global rates...
```

```
## [4] Running dNdSloc...
```

```
## [5] Running dNdScv...
```

```
## Regression model for substitutions: all covariates were used (theta = 5.28)  
.
```

```
## Regression model for indels: all covariates were used (theta = 1.4)
```

```
print(head(wgsout$sel_cv), digits = 3)
```

```
##      gene_name n_syn n_mis n_non n_spl n_ind wmis_cv wnon_cv wspl_cv  
## 6146   FAM196B    0     5     2     0     0   12.20   63.2   63.2  
## 16954  SULT2B1    0     2     0     0     2    5.15    0.0    0.0  
## 13340   POTEE     3    11     0     0     0    8.38    0.0    0.0  
## 16925  STXBP5L    2     0     3     0     1    0.00   10.2   10.2  
## 11870   OLFM4     0     0     0     0     2    0.00    0.0    0.0  
## 2710   C6orf118    1     8     0     0     0   11.73    0.0    0.0  
##      wind_cv  pmis_cv ptrunc_cv pallsubs_cv  pind_cv qmis_cv qtrunc_cv  
## 6146      0 4.41e-04 0.000573 1.71e-05 1.000000 0.790 0.952  
## 16954    123 9.24e-02 0.821319 2.35e-01 0.000220 0.790 0.952  
## 13340      0 1.20e-05 0.674260 5.71e-05 1.000000 0.208 0.952  
## 16925     26 5.21e-02 0.006017 1.58e-03 0.037204 0.790 0.952  
## 11870    146 2.94e-01 0.766392 5.54e-01 0.000157 0.790 0.952  
## 2710      0 2.07e-05 0.704545 9.87e-05 1.000000 0.208 0.952  
##      qallsubs_cv pglobal_cv qglobal_cv  
## 6146      0.343 0.000205 1  
## 16954      0.969 0.000561 1  
## 13340      0.573 0.000615 1  
## 16925      0.969 0.000630 1  
## 11870      0.969 0.000902 1  
## 2710      0.661 0.001009 1
```

```
wgs_signif_genes = wgsout$sel_cv[wgsout$sel_cv$qglobal_cv<0.1, c("gene_name", "qglobal_cv")]
rownames(wgs_signif_genes) = NULL
print(wgs_signif_genes)
```

```
## [1] gene_name qglobal_cv
## <0 rows> (or 0-length row.names)
```

```
print(wgsout$globaldnds)
```

```
##      name      mle      cilow      cihigh
## wmis wmis 0.9770452 0.9457840 1.009340
## wnon wnon 0.9846980 0.9082206 1.067615
## wspl wspl 0.9355197 0.8311536 1.052991
## wtru wtru 0.9691727 0.9047088 1.038230
## wall wall 0.9767169 0.9458699 1.008570
```

Thus there is no evidence of selection at the gene level, nor globally in the dataset.

b. Combined wgs and targeted analysis over all genes in baitset.

```
length(genes)
```

```
## [1] 90
```

```
combout <- dndscv(comb, gene_list = genes)
```

```
## [1] Loading the environment...
```

```
## [2] Annotating the mutations...
```

```
## Warning in dndscv(comb, gene_list = genes): Same mutations observed in
## different sampleIDs. Please verify that these are independent events and
## remove duplicates otherwise.
```

```
## [3] Estimating global rates...
```

```
## [4] Running dNdSloc...
```

```
## [5] Running dNdScv...
```

```
##      Regression model for substitutions: no covariates were used (theta = 1.66).
```

```
## Warning in theta.ml(Y, mu, sum(w), w, limit = control$maxit, trace =  
## control$trace > : iteration limit reached
```

```
## Warning in theta.ml(Y, mu, sum(w), w, limit = control$maxit, trace =  
## control$trace > : iteration limit reached
```

```
## Regression model for indels: no covariates were used (theta = 1.6e+04)
```

```
print(head(combout$sel_cv), digits = 3)
```

```
##      gene_name n_syn n_mis n_non n_spl n_ind wmis_cv wnon_cv wspl_cv wind_cv  
## 13      AXIN2     1     1     2     0     3   0.588  18.07  18.07  29.31  
## 80      STAG2     0     9     2     1     2  10.558  24.55  24.55  13.00  
## 7       ARID2     3     0     2     0     1   0.000   4.47   4.47   4.49  
## 86      TP53     0     1     0     0     2   2.250   0.00   0.00  41.86  
## 73      RNF43     0     7     1     0     1  10.563  16.41  16.41  10.52  
## 44      KDM6A     0     1     2     1     0   1.251  26.79  26.79   0.00  
##      pmiss_cv ptrunc_cv pallsubs_cv  pind_cv qmiss_cv qtrunc_cv qallsubs_cv  
## 13  0.6702    0.01236    0.02057 0.000166   0.850    0.278    0.370  
## 80  0.0104    0.00497    0.00762 0.010692   0.413    0.149    0.185  
## 7   0.0117    0.12441    0.00326 0.199585   0.413    0.874    0.185  
## 86  0.6045    0.78393    0.82585 0.001106   0.850    0.874    0.891  
## 73  0.0138    0.09296    0.03332 0.090686   0.413    0.869    0.500  
## 44  0.8872    0.00393    0.00662 1.000000   0.939    0.149    0.185  
##      pglobal_cv qglobal_cv  
## 13  4.63e-05    0.00416  
## 80  8.48e-04    0.03817  
## 7   5.42e-03    0.16262  
## 86  7.30e-03    0.16432  
## 73  2.06e-02    0.36996  
## 44  3.98e-02    0.54241
```

```
comb_signif_genes = combout$sel_cv[combout$sel_cv$qglobal_cv<0.1, c("gene_name", "q  
global_cv")]  
rownames(comb_signif_genes) = NULL  
print(comb_signif_genes)
```

```
##      gene_name  qglobal_cv  
## 1      AXIN2  0.004163356  
## 2      STAG2  0.038174299
```

```
print(combout$globaldnds)
```



```
##      name      mle      cilow      cihigh
## wmis wmis 0.8838778 0.7102556 1.099942
## wnon wnon 0.9415812 0.5825645 1.521849
## wspl wspl 1.0600806 0.5265670 2.134146
## wtru wtru 0.9751772 0.6465682 1.470797
## wall wall 0.8915288 0.7190344 1.105404
```

Thus two genes show evidence of positive selection. Global measures of positive and negative selection do not differ significantly from the null hypothesis of neutral mutations.

## 5) Test whether the global spectrum of driver mutations is different between cancer and normal.

Read in the table of gene driver mutation frequencies in TCGA cancers and in normal crypts.

```
comp <- read.csv('/Users/hl11/Documents/Projects/normal_colon/WGS_results/2018.08.02_tcga_crc_drivers/frequency_of_driver_mutations_in_tcga_vs_normal_crypts.txt', sep='\t', header = T, stringsAsFactors = F)
comp[,c("gene", "tcga", "normal", "tcgaprop", "normprop", "poistestpval")]
```

| ##    | gene   | tcga | normal | tcgaprop    | normprop     | poistestpval  |
|-------|--------|------|--------|-------------|--------------|---------------|
| ## 1  | APC    | 157  | 0      | 0.688596491 | 0.0000000000 | 5.848065e-127 |
| ## 2  | TP53   | 119  | 1      | 0.521929825 | 0.0008166599 | 2.117820e-94  |
| ## 3  | KRAS   | 79   | 0      | 0.346491228 | 0.0000000000 | 3.030332e-64  |
| ## 4  | PIK3CA | 27   | 2      | 0.118421053 | 0.0016333197 | 5.715771e-20  |
| ## 5  | BRAF   | 20   | 0      | 0.087719298 | 0.0000000000 | 8.305478e-17  |
| ## 6  | NRAS   | 20   | 0      | 0.087719298 | 0.0000000000 | 8.305478e-17  |
| ## 7  | AMER1  | 19   | 0      | 0.083333333 | 0.0000000000 | 5.289278e-16  |
| ## 8  | SMAD4  | 17   | 0      | 0.074561404 | 0.0000000000 | 2.145161e-14  |
| ## 9  | ATM    | 9    | 2      | 0.039473684 | 0.0016333197 | 2.354268e-06  |
| ## 10 | FBXW7  | 9    | 2      | 0.039473684 | 0.0016333197 | 2.354268e-06  |
| ## 11 | SOX9   | 9    | 0      | 0.039473684 | 0.0000000000 | 5.803822e-08  |
| ## 12 | ERBB3  | 7    | 2      | 0.030701754 | 0.0016333197 | 6.307790e-05  |
| ## 13 | PTEN   | 7    | 0      | 0.030701754 | 0.0000000000 | 2.353844e-06  |
| ## 14 | TCF7L2 | 7    | 0      | 0.030701754 | 0.0000000000 | 2.353844e-06  |
| ## 15 | ACVR2A | 6    | 0      | 0.026315789 | 0.0000000000 | 1.499027e-05  |
| ## 16 | MSH6   | 6    | 0      | 0.026315789 | 0.0000000000 | 1.499027e-05  |
| ## 17 | PIK3R1 | 6    | 0      | 0.026315789 | 0.0000000000 | 1.499027e-05  |
| ## 18 | ARID2  | 5    | 1      | 0.021929825 | 0.0008166599 | 4.978347e-04  |
| ## 19 | ASXL1  | 5    | 0      | 0.021929825 | 0.0000000000 | 9.546434e-05  |
| ## 20 | BCOR   | 5    | 0      | 0.021929825 | 0.0000000000 | 9.546434e-05  |
| ## 21 | ELF3   | 5    | 0      | 0.021929825 | 0.0000000000 | 9.546434e-05  |
| ## 22 | RBM10  | 5    | 0      | 0.021929825 | 0.0000000000 | 9.546434e-05  |
| ## 23 | SMAD2  | 5    | 0      | 0.021929825 | 0.0000000000 | 9.546434e-05  |
| ## 24 | B2M    | 4    | 0      | 0.017543860 | 0.0000000000 | 6.079571e-04  |
| ## 25 | BRCA2  | 4    | 1      | 0.017543860 | 0.0008166599 | 2.657928e-03  |
| ## 26 | KMT2D  | 4    | 0      | 0.017543860 | 0.0000000000 | 6.079571e-04  |
| ## 27 | NF1    | 4    | 0      | 0.017543860 | 0.0000000000 | 6.079571e-04  |

|    |    |         |   |   |              |              |              |
|----|----|---------|---|---|--------------|--------------|--------------|
| ## | 28 | POLE    | 4 | 0 | 0.017543860  | 0.0000000000 | 6.079571e-04 |
| ## | 29 | ROBO2   | 4 | 0 | 0.017543860  | 0.0000000000 | 6.079571e-04 |
| ## | 30 | SETD2   | 4 | 0 | 0.017543860  | 0.0000000000 | 6.079571e-04 |
| ## | 31 | AXIN2   | 3 | 3 | 0.013157895  | 0.0024499796 | 5.336328e-02 |
| ## | 32 | CARD11  | 3 | 0 | 0.013157895  | 0.0000000000 | 3.871727e-03 |
| ## | 33 | CDKN1B  | 3 | 1 | 0.013157895  | 0.0008166599 | 1.366304e-02 |
| ## | 34 | MAP2K4  | 3 | 0 | 0.013157895  | 0.0000000000 | 3.871727e-03 |
| ## | 35 | MGA     | 3 | 0 | 0.013157895  | 0.0000000000 | 3.871727e-03 |
| ## | 36 | RB1     | 3 | 0 | 0.013157895  | 0.0000000000 | 3.871727e-03 |
| ## | 37 | ATR     | 2 | 1 | 0.008771930  | 0.0008166599 | 6.622690e-02 |
| ## | 38 | CDH1    | 2 | 0 | 0.008771930  | 0.0000000000 | 2.465679e-02 |
| ## | 39 | CDK12   | 2 | 2 | 0.008771930  | 0.0016333197 | 1.187908e-01 |
| ## | 40 | FGFR2   | 2 | 0 | 0.008771930  | 0.0000000000 | 2.465679e-02 |
| ## | 41 | MAP2K1  | 2 | 0 | 0.008771930  | 0.0000000000 | 2.465679e-02 |
| ## | 42 | PTPN11  | 2 | 0 | 0.008771930  | 0.0000000000 | 2.465679e-02 |
| ## | 43 | QKI     | 2 | 0 | 0.008771930  | 0.0000000000 | 2.465679e-02 |
| ## | 44 | RNF43   | 2 | 2 | 0.008771930  | 0.0016333197 | 1.187908e-01 |
| ## | 45 | UBR5    | 2 | 0 | 0.008771930  | 0.0000000000 | 2.465679e-02 |
| ## | 46 | AXIN1   | 1 | 0 | 0.004385965  | 0.0000000000 | 1.570248e-01 |
| ## | 47 | CTNNB1  | 1 | 0 | 0.004385965  | 0.0000000000 | 1.570248e-01 |
| ## | 48 | EGFR    | 1 | 0 | 0.004385965  | 0.0000000000 | 1.570248e-01 |
| ## | 49 | EP300   | 1 | 0 | 0.004385965  | 0.0000000000 | 1.570248e-01 |
| ## | 50 | H3F3B   | 1 | 0 | 0.004385965  | 0.0000000000 | 1.570248e-01 |
| ## | 51 | KDR     | 1 | 0 | 0.004385965  | 0.0000000000 | 1.570248e-01 |
| ## | 52 | MSH2    | 1 | 0 | 0.004385965  | 0.0000000000 | 1.570248e-01 |
| ## | 53 | NF2     | 1 | 0 | 0.004385965  | 0.0000000000 | 1.570248e-01 |
| ## | 54 | PTCH1   | 1 | 0 | 0.004385965  | 0.0000000000 | 1.570248e-01 |
| ## | 55 | RAD21   | 1 | 0 | 0.004385965  | 0.0000000000 | 1.570248e-01 |
| ## | 56 | STAG2   | 1 | 2 | 0.004385965  | 0.0016333197 | 4.009757e-01 |
| ## | 57 | TBX3    | 1 | 0 | 0.004385965  | 0.0000000000 | 1.570248e-01 |
| ## | 58 | TGFBR2  | 1 | 0 | 0.004385965  | 0.0000000000 | 1.570248e-01 |
| ## | 59 | ERBB2   | 0 | 3 | 0.0000000000 | 0.0024499796 | 1.000000e+00 |
| ## | 60 | TBL1XR1 | 0 | 1 | 0.0000000000 | 0.0008166599 | 1.000000e+00 |

Sample from the tcga distribution 1,000 times, and every time take a measure of the flatness of the distribution.

```

tcgagenes <- as.character(unlist(apply(comp,1,function(row) rep(row['gene'], row['
tcga']))))

sampsds <- c()
for (i in 1:1000) {
  tsamp <- sample(tcgagenes, sum(comp$normal), replace=T)
  tcnts <- as.numeric(table(tsamp))
  sampsds <- c(sampsds, sd(tcnts))
}
hist(sampsds, col="grey", 50, main="Standard deviation of random samples \n from T
CGA distribution of driver mutations")
abline(v=sd(comp$normal), col="red")

```

## Standard deviation of random samples from TCGA distribution of driver mutations

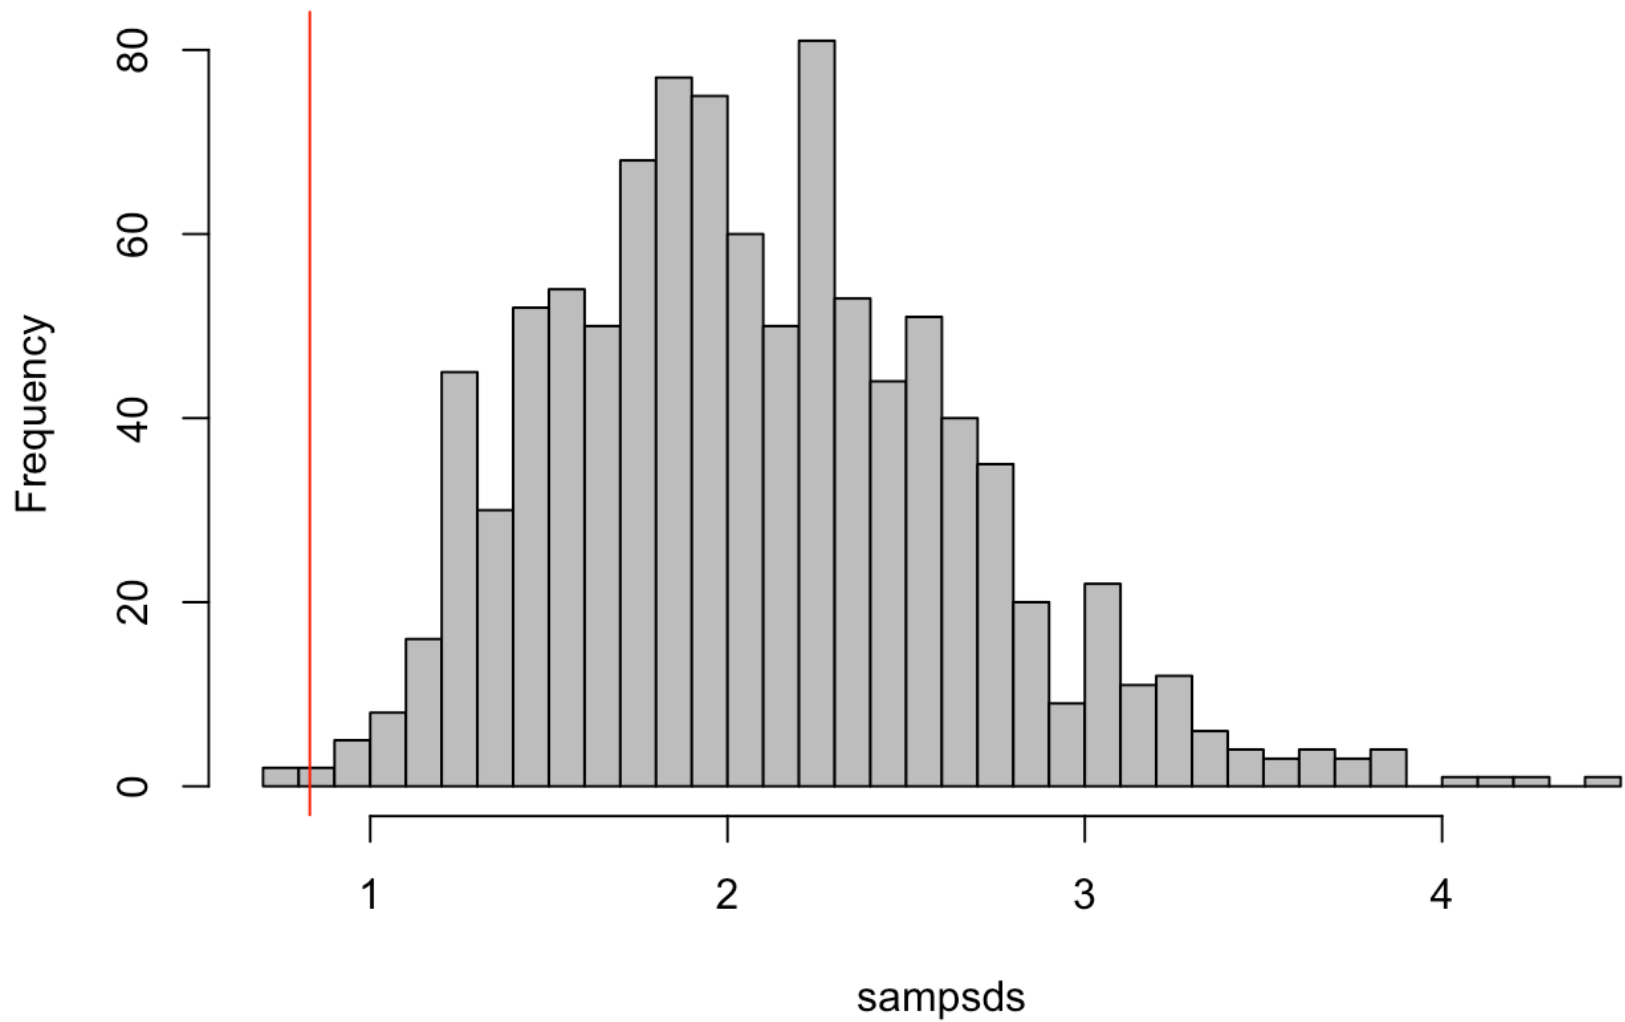

Now print the probability of getting such a flat distribution as we observe in the normal tissues if normal drivers were just resampling from cancer drivers.

```
length(which(sampsds<=sd(comp$normal)))/length(sampsds)
```

```
## [1] 0.003
```
